# Supplementary material for: Microbiota based personalized nutrition improves hyperglycaemia and hypertension parameters and reduces inflammation: a prospective, open label, controlled, randomized, comparative, proof of concept study
Source: PeerJ. 2024 Jun 26;12:e17583. doi: 10.7717/peerj.17583 (PMC11214429; doi:10.7717/peerj.17583)
Supplement: Supplemental Information 1 [file peerj-12-17583-s001.xlsx]

## Sheet: Species
Species	PRE	POST
Prevotella_copri	0.497957	0.400051
Dorea_sp__AM58_8	7.54352e-05	0.0445236
Prevotella_hominis	0.0485209	0.0329045
Dialister_succinatiphilus	0.0160235	0.0311006
Prevotella_sp__Marseille_P4119	0.0233453	0.0264167
Prevotella_sp__AM23_5	0.0169299	0.0172596
Succinivibrio_dextrinosolvens	0.00279953	0.0172164
Treponema_succinifaciens	0.0162249	0.0165684
Prevotella_sp__AM42_24	0.0133537	0.0153704
Prevotella_sp__AM34_19LB	0.010437	0.0128525
Parabacteroides_merdae	0.00322644	0.0121544
Mitsuokella_jalaludinii	0.00715076	0.0113925
Flavonifractor_plautii	0.0042623	0.0106193
Lachnoclostridium_pacaense	0.00353745	0.00928235
Oscillibacter_sp__MSJ_31	0.00420667	0.00887922
Succinivibrio_sp__AGMB01872	0.00200725	0.00783266
Prevotella_sp__tc2_28	0.000225041	0.00723593
Paraprevotella_clara	0.00396056	0.00660845
Haemophilus_parainfluenzae	0.0142682	0.00629073
Streptococcus_salivarius	0.00789752	0.00596161
Phocaeicola_plebeius	0.0712239	0.00582837
Ruminococcus_sp__M6(2020)	0.000361162	0.0055915
Papillibacter_cinnamivorans	0.000177842	0.00553229
Coprococcus_eutactus	0.00368242	0.00549243
Akkermansia_muciniphila	0.00289646	0.00535008
Alistipes_putredinis	0.00294872	0.00513826
Duodenibacillus_massiliensis	0.00224494	0.0049105
Phocaeicola_coprophilus	0.00799192	0.00482168
Intestinimonas_sp__MSJ_38	0.000622446	0.0048194
Selenomonas_bovis	0.00703318	0.00472716
Vescimonas_fastidiosa	0.00228834	0.00458481
Clostridium_nigeriense	6.36353e-05	0.00455178
Citrobacter_cronae	0.00223861	0.00427847
Collinsella_aerofaciens	0.00133803	0.0041327
Nostoc_sp__C057	0.00102491	0.00402679
Ruminococcus_sp__1001270H_150608_F2	0.00624048	0.00402452
Parabacteroides_distasonis	0.00309242	0.00394024
Prevotella_sp__P5_64	0.00260736	0.00381612
Bacteroides_fragilis	0.00243458	0.00373754
Paramuribaculum_intestinale	0.000102407	0.00363277
Roseburia_sp__CLA_AA_H209	1.26428e-05	0.00357469
Ruminococcus_sp__210702_SL_1_03	0.000348519	0.00346309
Alistipes_finegoldii	0.00254878	0.00334693
Prevotella_sp__P5_126	0.000701674	0.0033196
Prevotella_sp__P4_67	0.00251043	0.00330935
Clostridium_sp__1001271B_151109_B4	0.00117199	0.00317042
Bacteroides_sp__NMBE5	0.000609803	0.00264999
Dialister_hominis	0.00234439	0.00256002
Coprococcus_catus	0.00125416	0.00251105
Bacteroides_thetaiotaomicron	0.00253614	0.00245525
Selenomonas_ruminantium	0.000655317	0.00233682
Prevotella_sp__P4_51	0.0027713	0.00215575
Prevotella_sp__P3_122	0.00117957	0.00215233
Methanobrevibacter_smithii	0.00116482	0.0019872
Collinsella_sp__4_8_47FAA	8.47066e-05	0.00192457
Ruthenibacterium_lactatiformans	0.00168655	0.00178791
Citrobacter_freundii	0.000383076	0.00173781
Phocaeicola_dorei	0.0041776	0.00167403
Weissella_confusa	0.000761517	0.0016729
Muribaculum_intestinale	0.000234734	0.0016729
Vescimonas_coprocola	0.00271946	0.00167062
Oscillibacter_sp__ER4	0.00362131	0.00165695
Parabacteroides_massiliensis	0.00128619	0.0015966
Bacteroides_mediterraneensis	0.00174892	0.00157724
Veillonella_sp__T11011_6	0.000222513	0.00156129
Alloprevotella_tannerae	0.000152556	0.00156015
Clostridium_sp__AM32_2	0.000619918	0.00154763
Clostridium_sp__TM06_18	0.000696617	0.00144286
Streptococcus_parasanguinis	0.0013414	0.00142578
Sutterella_faecalis	0.000791438	0.00142122
Flavonifractor_sp__AGMB03687	0.000264656	0.00141439
Lachnospira_eligens	0.000792702	0.00137681
Clostridium_sp__AM09_51	0.000589154	0.00136314
Allisonella_histaminiformans	0.000866452	0.0013472
Dysosmobacter_sp__BX15	0.00185259	0.00132556
Alistipes_communis	0.00148216	0.00130734
Enterocloster_lavalensis	0.000901852	0.00130734
Parabacteroides_sp__ZJ_118	0.000533947	0.0012857
Ruminococcus_bromii	0.00114459	0.00128229
Prevotella_sp__MGM2	0.000548697	0.00121852
Prevotella_sp__FD3004	7.79638e-05	0.00119232
Odoribacter_splanchnicus	0.00137891	0.00118777
Enterocloster_bolteae	0.000968858	0.00117638
Phocaeicola_sp__Sa1CVN1	0.00219605	0.00114563
Ruminococcus_sp__AF37_20	0.00052004	0.0011035
Ruminococcus_sp__Marseille_P6503	0.000342619	0.00109211
Mitsuokella_sp__AF21_1AC	0.000211134	0.00102947
Bacteroides_stercoris	0.00116187	0.000996449
Haemophilus_parahaemolyticus	0.000153399	0.000990755
Eubacterium_coprostanoligenes	0.00100552	0.000956591
Veillonella_seminalis	1.51713e-05	0.000953175
Victivallis_vadensis	0.00161617	0.000939509
Pseudoflavonifractor_sp__MSJ_30	0.00208732	0.000915594
Sporobacter_termitidis	0.000272663	0.000898513
Prevotella_sp__MA2016	0.00024232	0.000880292
Bacteroides_sp__AM16_15	0.000852966	0.000873459
Anaerotruncus_colihominis	0.000683974	0.000865487
Roseburia_sp__AM59_24XD	0.000313541	0.000859793
Prevotella_marseillensis	0.000308484	0.000859793
Ruminococcus_albus	0.000839059	0.000813103
Flintibacter_sp__BX5	0.000343884	0.00080627
Ruminococcus_sp__AF34_12	0.000439547	0.000781216
Phocaeicola_sartorii	0.00125627	0.000757301
Pseudonocardia_cytotoxica	5.05711e-06	0.000751607
Bacteroides_sp__9_1_42FAA	0.000198913	0.000731109
Colidextribacter_sp__210702_DFI_3_9	0.00044629	0.000726554
Streptococcus_gallolyticus	0.00228118	0.000714027
Candidatus_Borkfalkia_ceftriaxoniphila	0.000329134	0.000685557
Prevotella_sp__P5_108	0.00246745	0.000677585
Sutterella_seckii	0.0018488	0.000666197
Phocea_massiliensis	0.000322391	0.000662781
Prevotella_sp__kh1p2	0.000359476	0.000657087
Ruminococcus_flavefaciens	0.00105525	0.000634311
Selenomonas_montiformis	0.000395298	0.000625201
Ruminococcus_sp__HUN007	0.00030132	0.000620646
Sutterella_sp__KLE1602	0.000783009	0.000608119
Enterobacter_timonensis	0.00293186	0.000602425
Streptococcus_infantarius	0.00155885	0.000601286
Coprococcus_sp__AF38_1	0.000654896	0.000596731
Clostridium_sp__AM22_11AC	0.000691139	0.000594453
Veillonella_sp__oral_taxon_158	0.000425219	0.000584204
Dysosmobacter_acutus	0.000812509	0.000581926
Emergencia_timonensis	8.8078e-05	0.000581926
Roseburia_sp__CLA_AA_H204	1.22214e-05	0.000570538
Enterococcus_hirae	0.000172785	0.000558012
Campylobacter_jejuni	0.00046399	0.000556873
Clostridium_sp__AF43_10	0.000237263	0.000555734
Prevotella_pectinovora	0.00117915	0.000546624
Pseudoflavonifractor_sp__AF19_9AC	0.000335034	0.000532958
Limosilactobacillus_mucosae	0.000551225	0.00053068
Prevotella_disiens	0.000304691	0.00053068
Ruminococcus_bovis	0.00149353	0.000524986
Prevotella_multisaccharivorax	0.000386026	0.000523848
Enterocloster_asparagiformis	7.7121e-05	0.000510182
Butyricicoccus_intestinisimiae	0.00128661	0.000507904
Prevotella_bryantii	0.000808295	0.000503349
Cronobacter_sakazakii	0.000820938	0.00050221
Alistipes_indistinctus	4.2564e-05	0.000491961
Kineothrix_sp__MSJ_39	0.00158161	0.000478296
Clostridium_sp__AM42_36	0.000223777	0.000478296
Prevotella_sp__ne3005	0.000284463	0.00047374
Prevotella_sp__P2_180	0.00066796	0.000466908
Parafannyhessea_umbonata	0.000222091	0.00046463
Kluyveromyces_marxianus	0.000293312	0.000463491
Vibrio_cholerae	0.000827681	0.000457797
Pseudoflavonifractor_sp__MCC625	0.000166042	0.000457797
Flavonifractor_sp__An10	0.000238949	0.000450964
Prevotella_multiformis	0.000243584	0.000439576
Oscillibacter_sp__NSJ_62	0.000337141	0.000432744
Acutalibacter_muris	0.000234734	0.000432744
Clostridium_sp__D43t1_170807_H7	0.000419319	0.000431605
Clostridium_celatum	0.00020692	0.000431605
Butyricimonas_virosa	0.000585361	0.000420217
Oscillibacter_sp__CU971	0.000246113	0.000417939
Thermococcus_sp__Bubb_Bath	2.23356e-05	0.000417939
Saccharomyces_cerevisiae	0.000166885	0.000413384
Massilistercora_timonensis	5.98425e-05	0.000408829
Agathobaculum_butyriciproducens	0.000561761	0.000389469
Blautia_massiliensis	0.000388976	0.000387192
Lachnoanaerobaculum_sp__Marseille_Q4761	2.61284e-05	0.000387192
Collinsella_sp__AM34_10	0.000585782	0.000381498
Collinsella_sp__AF15_51	0.000100721	0.00037922
Clostridium_sp__OF13_4	8.47066e-05	0.000371249
Prevotella_shahii	0.000204392	0.000366693
Ruminococcus_sp__AF19_15	0.000316069	0.000365555
Ruminococcus_sp__MSJ_25	0.000179106	0.000365555
Pseudoflavonifractor_sp__524_17	0.000169413	0.000359861
Clostridium_beijerinckii	0.000167306	0.000355305
Waltera_intestinalis	8.42852e-06	0.000355305
Megasphaera_hexanoica	0.000196385	0.000349611
Ruminococcus_sp__OM02_16LB	0.000157613	0.000347334
Clostridium_sp__AF29_8BH	0.000117156	0.000346195
Oscillibacter_sp__MCC667	0.00208943	0.000343917
Bacteroides_sp__K03	0.000163935	0.000343917
Pseudoflavonifractor_sp__60	0.000256227	0.000337085
Prevotella_sp__P5_92	0.00051414	0.000335946
Dysosmobacter_sp__Marseille_Q4140	0.000369169	0.000334807
Oscillibacter_sp__1_3	0.000500654	0.000332529
Bacteroides_caecigallinarum	0.00028067	0.000332529
Bacteroides_sp__3_1_33FAA	0.00018922	0.000329113
Ruminococcus_sp__AF45_4BH	4.2564e-05	0.000329113
Butyricicoccus_sp__AM27_36	0.000170678	0.000324558
Clostridium_sp__D53t1_180928_C8	0.000378441	0.000320003
Parabacteroides_sp__N37	0.00025117	0.000312031
Clostridium_septicum	9.18709e-05	0.000305198
Clostridium_sp__DJ247	5.64711e-05	0.000299504
Hungatella_hathewayi	0.000327027	0.000294949
Pseudoflavonifractor_phocaeensis	0.000353155	0.00029381
Clostridium_sp__AF21_20LB	0.000123899	0.000291533
Prevotella_sp__DNF00663	0.000216192	0.000288116
Acutalibacter_sp__1XD8_33	0.000132749	0.000286977
Elizabethkingia_anophelis	4.59354e-05	0.000286977
Dysosmobacter_welbionis	0.000565554	0.000285839
Eubacterium_sp__MSJ_21	0.000143285	0.000282422
Prevotella_lascolaii	0.000570611	0.000280145
Ruminococcus_sp__FC2018	0.00024527	0.000279006
Pseudomonas_daroniae	5.60497e-05	0.000277867
Intestinimonas_butyriciproducens	0.00121834	0.000275589
Lawsonibacter_sp__NSJ_51	0.000176577	0.000272173
Clostridium_sp__AF23_8	0.000203549	0.000271034
Phocaeicola_salanitronis	5.56282e-05	0.000269895
Blastocystis_hominis	0.000273505	0.000268757
Bacteroides_sp__HPS0048	0.000160563	0.000268757
Pseudoflavonifractor_capillosus	0.000287413	0.000266479
Acetanaerobacterium_elongatum	9.86137e-05	0.00026534
Veillonella_rogosae	0.000327027	0.000259646
Clostridium_scindens	0.000223777	0.000258507
Anaerobacterium_chartisolvens	8.00709e-05	0.000257369
Prevotella_oulorum	0.000134013	0.00025623
Blautia_sp__MCC283	0.000333348	0.000251675
Angelakisella_massiliensis	0.000175313	0.000248258
Prevotella_sp__HJM029	9.77708e-05	0.000248258
Hydrogenoanaerobacterium_saccharovorans	0.000174892	0.000244842
Faecalibacterium_sp__AM43_5AT	5.52068e-05	0.000244842
Anaerotruncus_rubiinfantis	0.000149606	0.000243703
Prevotella_buccalis	0.000126428	0.000242564
Herbaspirillum_sp__RU_5E	2.06499e-05	0.000238009
Dialister_massiliensis	0.00240508	0.00023687
Bacteroides_coprosuis	3.62426e-05	0.00023687
Streptomyces_kurssanovii	3.20284e-05	0.000232315
Butyricicoccus_porcorum	0.000219984	0.000230037
Prevotella_sp__PINT	0.000161828	0.000228899
Clostridium_intestinale	0.000119264	0.00022776
Clostridium_sp__AM27_28	0.00020692	0.000226621
Mordavella_massiliensis	9.35566e-05	0.000226621
Lachnotalea_sp__AF33_28	0.000143706	0.000225482
Oscillibacter_valericigenes	0.000379705	0.000224343
Dorea_formicigenerans	0.000257913	0.000224343
Limosilactobacillus_fermentum	0.000220406	0.000222066
Ruminococcus_bicirculans	0.000194699	0.000222066
Ruminococcus_sp__AF31_8BH	3.45569e-05	0.000222066
Marseilla_massiliensis	0.000142021	0.000220927
Clostridium_sp__OM08_29	0.000308905	0.000218649
Lactobacillus_helveticus	0.000258756	0.000218649
Clostridium_phoceensis	0.000872773	0.000215233
Prevotella_sp__oral_taxon_313	0.000105778	0.000214094
Clostridium_sp__OM04_12AA	0.000160985	0.000212955
Clostridium_sp__AF22_10	8.30209e-05	0.000212955
Prevotella_pleuritidis	0.000133171	0.0002084
Eisenbergiella_tayi	0.000732438	0.000207261
Anaerotruncus_sp__AF02_27	0.000152135	0.000206123
Prevotella_oryzae	0.000138228	0.000206123
Prevotella_sp__S7_1_8	0.000259598	0.000202706
Pseudoruminococcus_massiliensis	0.00076531	0.000201567
Ruminococcus_champanellensis	0.000374648	0.000200429
Ruminococcus_sp__AF17_22AC	7.50138e-05	0.00019929
Phocaeicola_massiliensis	0.000825995	0.000198151
Victivallis_lenta	0.000808295	0.000197012
Pusillibacter_faecalis	0.000206499	0.000195873
Clostridium_fessum	6.95353e-05	0.000195873
Pseudoflavonifractor_sp__MSJ_37	0.000701674	0.000193596
Ruminococcus_sp__AF43_11	9.18709e-05	0.000193596
Ruminococcus_sp__AM43_6	0.000242741	0.000192457
Holdemanella_sp__DFI_5_55	7.58567e-05	0.000191318
Kineothrix_alysoides	6.06853e-05	0.000191318
Prevotella_sp__BP1_145	9.81923e-05	0.000185624
Alloprevotella_sp__OH1205_COT_284	2.99212e-05	0.000185624
Neobittarella_massiliensis	0.000181213	0.000184485
Clostridium_ihumii	0.000147078	0.000184485
Heminiphilus_faecis	6.74282e-05	0.000184485
Dorea_sp__210702_DFI_3_125	4.34069e-05	0.000184485
Alistipes_megaguti	0.000187113	0.000183347
Parabacteroides_timonensis	0.000111678	0.000183347
Aliarcobacter_cryaerophilus	4.50926e-05	0.000183347
Butyricicoccus_sp__AM05_1	6.57425e-05	0.000181069
Clostridium_indicum	9.60851e-05	0.000178791
Prevotella_histicola	0.000345569	0.000176514
Evtepia_gabavorous	0.000324919	0.000176514
Clostridium_sp__AT4	0.000160985	0.000175375
Streptococcus_sp__HSISS2	0.000186692	0.000174236
Ruminococcus_sp__AF25_19	0.000130221	0.000174236
Dorea_sp__AF36_15AT	0.000262127	0.000171959
Butyricicoccus_pullicaecorum	0.000225884	0.00017082
Clostridium_sp__1001270H_150608_G6	0.000199756	0.00017082
Bacteroides_sp__AF17_1	0.000152135	0.000169681
Ructibacterium_gallinarum	0.000163935	0.000168542
Parabacteroides_sp__AF39_10AC	0.000119264	0.000168542
Veillonella_sp__CLA_AA_H247	9.35566e-05	0.000168542
Ruminococcus_sp__AF46_10NS	0.000114628	0.000167403
Bacteroides_ilei	7.62781e-05	0.000167403
Massiliimalia_massiliensis	6.65853e-05	0.000166265
Clostridium_aminophilum	0.000179106	0.000165126
Citrobacter_portucalensis	9.01852e-05	0.000165126
Clostridium_jeddahense	0.000125164	0.000163987
Intestinibacillus_massiliensis	0.00024822	0.000162848
Blautia_argi	6.91139e-05	0.000159432
Oscillibacter_sp__PC13	0.000442919	0.000158293
Collinsella_sp__OM08_14AT	7.24853e-05	0.000158293
Dorea_sp__AGR2135	2.5707e-05	0.000157154
Clostridium_sp__D43t1_170807_D5	0.000161828	0.000153738
Acinetobacter_calcoaceticus	6.57425e-05	0.000153738
Lachnoclostridium_sp__An138	9.1028e-05	0.000152599
Senegalimassilia_anaerobia	0.000238106	0.00015146
Clostridium_pasteurianum	8.34423e-05	0.00015146
Prevotella_intermedia	7.29067e-05	0.00015146
Flavonifractor_sp__An100	0.00019807	0.000150321
Clostridium_sp__OF03_18AA	0.00018922	0.000150321
Prevotella_conceptionensis	5.4364e-05	0.000149183
Clostridium_saudiense	0.000282777	0.000148044
Lachnoclostridium_sp__An14	8.30209e-05	0.000146905
Ruminococcus_sp__OM08_9BH	0.000162249	0.000145766
Roseburia_inulinivorans	5.89996e-06	0.000145766
Prevotella_sp__Rep29	0.000155928	0.000144627
Blastocystis_sp__subtype_4	0.000117578	0.000144627
Prevotella_sp__PCHR	0.000220827	0.000143489
Dorea_sp__OM02_2LB	4.00355e-05	0.000143489
Oribacterium_sp__oral_taxon_078	0.000118842	0.00014235
Candidatus_Soleaferrea_massiliensis	0.000101564	0.000140072
Stomatobaculum_longum	7.79638e-05	0.000140072
Bifidobacterium_catenulatum	7.58567e-06	0.000140072
Clostridium_sp__ATCC_BAA_442	0.000141599	0.000138933
Eubacterium_sp__An3	6.74282e-05	0.000138933
Pseudoprevotella_muciniphila	0.000142021	0.000137795
Clostridium_sp__Ade_TY	0.000124321	0.000137795
Clostridium_sp__KNHs214	7.37495e-05	0.000136656
Prevotella_jejuni	6.95353e-05	0.000136656
Ruminococcus_sp__AM41_10BH	0.00016857	0.000135517
Ruminococcus_sp__AM54_1NS	0.000157613	0.000135517
Bariatricus_massiliensis	0.000119685	0.000135517
Mageeibacillus_indolicus	0.000103249	0.000133239
Prevotella_sp__HUN102	6.2371e-05	0.000132101
Mycolicibacterium_aubagnense	0.000139071	0.000129823
Lacrimispora_sp__210928_DFI_3_58	0.000123056	0.000129823
Prevotella_sp__HMSC073D09	9.06066e-05	0.000129823
Anaeromassilibacillus_sp__An172	6.5321e-05	0.000129823
Acidaminococcus_timonensis	3.62426e-05	0.000129823
Paeniclostridium_sordellii	2.44427e-05	0.000129823
Clostridium_sp__MCC344	0.000120106	0.000128684
Veillonella_sp__AM51_8BH	9.65065e-05	0.000127546
Clostridium_sp__AM33_3	2.69713e-05	0.000127546
Collinsella_sp__AM18_10	0.000104514	0.000126407
Prevotella_bergensis	7.92281e-05	0.000126407
Veillonella_nakazawae	3.11855e-05	0.000126407
Prevotella_aurantiaca	6.02639e-05	0.000125268
Ruminococcus_sp__NK3A76	0.000229677	0.000124129
Flintibacter_sp__KGMB00164	0.000104935	0.000124129
Barnesiella_sp__WM24	9.43994e-05	0.000124129
Anaerostipes_butyraticus	4.88854e-05	0.000124129
Haemophilus_influenzae	0.000249063	0.00012299
Prevotella_nigrescens	3.87712e-05	0.00012299
Acinetobacter_junii	2.8657e-05	0.00012299
Prevotella_sp__P4_119	0.000188377	0.000120713
Parabacteroides_goldsteinii	7.1221e-05	0.000120713
Clostridium_sp__AM42_4	8.04924e-05	0.000119574
Prevotella_veroralis	0.000112521	0.000118435
Inconstantimicrobium_porci	4.50926e-05	0.000118435
Dictyostelium_purpureum	2.82355e-05	0.000118435
Anaerotignum_lactatifermentans	0.000166463	0.000117296
Prevotella_sp__OH937_COT_195	9.86137e-05	0.000117296
Clostridium_chromiireducens	7.66995e-05	0.000117296
Pseudoflavonifractor_sp__An184	0.000146235	0.000116158
Clostridium_sp__W14A	4.34069e-05	0.000116158
Butyricicoccus_sp__AM28_25	0.000146656	0.000115019
Anaerobiospirillum_thomasii	8.21781e-05	0.000115019
Helicobacter_pylori	0.000104514	0.00011388
Clostridium_grantii	7.33281e-05	0.00011388
Bacteroides_faecis	1.22214e-05	0.00011388
Oscillibacter_sp__PEA192	0.000445026	0.000112741
Clostridium_sp__AF37_5	0.000241477	0.000112741
Barnesiella_sp__An22	4.46712e-05	0.000112741
Bacteroides_ovatus	5.05711e-06	0.000112741
Lachnospira_sp__NSJ_43	0.000849173	0.000111602
Clostridium_sp__AM25_23AC	0.000202706	0.000110464
Coprobacillus_cateniformis	7.66995e-05	0.000109325
Clostridium_sp__K04	9.01852e-05	0.000108186
Clostridium_fallax	4.12997e-05	0.000108186
Ruminococcus_sp__AM31_32	5.47854e-05	0.000107047
Aeromonas_veronii	1.89642e-05	0.000107047
Dysosmobacter_sp__NSJ_60	0.000126428	0.000105908
Butyrivibrio_sp__FCS014	0.000126428	0.00010477
Phocaeicola_barnesiae	8.63923e-05	0.00010477
Butyrivibrio_sp__XPD2006	4.12997e-05	0.00010477
Oribacterium_sp__C9	0.000161406	0.000103631
Agathobaculum_sp__Marseille_P7918	0.000158878	0.000103631
Clostridium_sp__AM51_4	0.000109571	0.000103631
Prevotella_timonensis	0.000108728	0.000103631
Clostridium_cuniculi	6.36353e-05	0.000103631
Lachnoanaerobaculum_sp__OBRC5_5	5.81568e-05	0.000103631
Thermoclostridium_caenicola	5.30997e-05	0.000103631
Clostridium_sp__TF11_13AC	0.000126428	0.000102492
Anaerofilum_sp__BX8	0.000125585	0.000102492
Megasphaera_stantonii	4.80426e-05	0.000102492
Butyricicoccus_sp__AM29_23AC	6.65853e-05	0.000101353
Prevotella_koreensis	0.000101142	0.000100214
Prevotella_maculosa	6.70067e-05	0.000100214
Intestinimonas_gabonensis	0.000289941	9.90755e-05
Bacteroides_gallinaceum	9.6928e-05	9.90755e-05
Faecalibacterium_sp__4P15	2.52856e-05	9.90755e-05
Azoarcus_communis	3.79283e-05	9.79367e-05
Prevotella_dentasini	0.000136121	9.67979e-05
Clostridium_bornimense	0.000109992	9.67979e-05
Clostridium_disporicum	8.55495e-05	9.67979e-05
Blautia_sp__TF11_31AT	8.42852e-05	9.67979e-05
Prevotella_sp__PMUR	0.000130221	9.45203e-05
Clostridium_gasigenes	0.000105356	9.45203e-05
Oribacterium_sp__WCC10	0.000101142	9.45203e-05
Clostridium_argentinense	7.54352e-05	9.45203e-05
Negativibacillus_massiliensis	5.09925e-05	9.45203e-05
Megasphaera_cerevisiae	4.46712e-05	9.45203e-05
Lachnospira_multipara	2.19142e-05	9.45203e-05
Holdemania_filiformis	0.000109149	9.33815e-05
Prevotella_nanceiensis	5.56282e-05	9.33815e-05
Colwellia_psychrerythraea	5.1414e-05	9.33815e-05
Prevotella_sp__oral_taxon_475	4.04569e-05	9.33815e-05
Ruminococcus_sp__AF42_9BH	3.66641e-05	9.33815e-05
Blautia_sp__AF17_9LB	5.98425e-05	9.22427e-05
Clostridium_sardiniense	0.000102407	9.11039e-05
Clostridium_sp__YIM_B02565	6.86924e-05	9.11039e-05
Roseburia_sp__AF02_12	2.99212e-05	9.11039e-05
Mogibacterium_kristiansenii	0.000114206	8.99651e-05
Barnesiella_sp__CU968	9.18709e-05	8.99651e-05
Sinorhizobium_sp__GL28	8.00709e-05	8.99651e-05
Porphyromonas_gingivalis	7.62781e-05	8.99651e-05
Prevotella_sp__P6B4	5.60497e-05	8.99651e-05
Butyricimonas_faecihominis	0.000100721	8.88263e-05
Bacteroides_sp__AF18_33	9.27137e-05	8.88263e-05
Oribacterium_sp__P6A1	0.000153399	8.76875e-05
Prevotella_sp__MGM1	9.77708e-05	8.76875e-05
Marvinbryantia_formatexigens	8.5128e-05	8.76875e-05
Blautia_sp__BX17	4.5514e-05	8.76875e-05
Butyricicoccus_sp__BIOML_A1	9.81923e-05	8.54099e-05
Prevotella_ruminicola	0.000200599	8.42711e-05
Hydrogeniiclostidium_mannosilyticum	8.04924e-05	8.42711e-05
Megasphaera_sp__DJF_B143	6.27925e-05	8.42711e-05
Clostridium_botulinum	1.6857e-05	8.42711e-05
Clostridium_sp__AM45_5	0.000134013	8.31323e-05
Buchnera_aphidicola	8.68137e-05	8.31323e-05
Clostridium_manihotivorum	3.53998e-05	8.31323e-05
Bacteroides_sp__AM37_9	1.81213e-05	8.31323e-05
Lachnoclostridium_sp__An196	0.000144971	8.19935e-05
Enterocloster_citroniae	4.71997e-05	8.19935e-05
Prochlorococcus_marinus	4.00355e-05	8.19935e-05
Bradyrhizobium_sp__MOS002	1.17999e-05	8.19935e-05
Parasutterella_excrementihominis	0.000501918	8.08547e-05
Lawsonibacter_sp__NSJ_52	0.000123056	8.08547e-05
Ruminococcus_sp__1001713B170214_170313_A12	5.05711e-05	8.08547e-05
Clostridium_chrysemydis	4.59354e-05	8.08547e-05
Clostridium_sp__AM58_1XD	3.45569e-05	8.08547e-05
Frisingicoccus_caecimuris	3.16069e-05	8.08547e-05
Anaerostipes_sp__Marseille_Q3525	3.11855e-05	8.08547e-05
Eimeria_maxima	2.69713e-05	8.08547e-05
Massilioclostridium_coli	8.89209e-05	7.97159e-05
Eisenbergiella_massiliensis	5.77354e-05	7.97159e-05
Clostridium_sartagoforme	5.64711e-05	7.97159e-05
Anaerostipes_sp__992a	3.53998e-05	7.97159e-05
Clostridium_sp__AF02_29	0.000123478	7.85771e-05
Ruminococcus_sp__AM47_2BH	0.000102407	7.85771e-05
Intestinimonas_massiliensis	7.4171e-05	7.85771e-05
Succinatimonas_hippei	0.000148763	7.74383e-05
Paraclostridium_bifermentans	0.000138228	7.74383e-05
Sodaliphilus_pleomorphus	0.000103249	7.74383e-05
Butyricicoccus_sp__AF35_5AC	8.17566e-05	7.74383e-05
Clostridium_fimetarium	2.44427e-05	7.74383e-05
Ruminococcus_sp__OM08_7	6.65853e-05	7.62995e-05
Finegoldia_magna	5.81568e-05	7.62995e-05
Faecalibacterium_sp__Marseille_Q4137	3.66641e-05	7.62995e-05
Blautia_glucerasea	4.34069e-05	7.51607e-05
Faecalibacterium_sp__CLA_AA_H254	3.70855e-05	7.51607e-05
Faecalibacterium_sp__Marseille_Q4896	6.86924e-05	7.40219e-05
Collinsella_tanakaei	4.50926e-05	7.40219e-05
Megamonas_funiformis	8.42852e-06	7.40219e-05
Pseudobutyrivibrio_sp__ACV_2	3.66641e-05	7.28831e-05
Dechloromonas_sp__Dech2017	3.20284e-05	7.28831e-05
Subdoligranulum_variabile	6.02639e-05	7.17443e-05
Anaerofilum_sp__An201	4.71997e-05	7.17443e-05
Clostridium_sp__AM22_16AC	3.83498e-05	7.17443e-05
Oribacterium_sp__oral_taxon_102	0.000315648	7.06055e-05
Anaerobiospirillum_succiniciproducens	9.35566e-05	7.06055e-05
Clostridium_sp__MSJ_8	8.38638e-05	7.06055e-05
Clostridium_acetireducens	7.96495e-05	7.06055e-05
Metaprevotella_massiliensis	6.02639e-05	7.06055e-05
Eubacterium_cellulosolvens	5.26782e-05	7.06055e-05
Butyrivibrio_sp__YAB3001	5.01497e-05	7.06055e-05
Veillonella_sp__T14073_2	3.37141e-05	7.06055e-05
Bacteroides_sp__AF20_13LB	2.69713e-05	7.06055e-05
Clostridium_paraputrificum	0.000278984	6.94667e-05
Prevotella_dentalis	9.60851e-05	6.94667e-05
Blautia_sp__1001283B150304_161114_C9	5.05711e-05	6.94667e-05
Streptomyces_sp__DH12	4.29854e-05	6.94667e-05
Blautia_sp__An249	4.04569e-05	6.94667e-05
Clostridium_sporogenes	3.45569e-05	6.94667e-05
Ruminococcus_sp__AF19_29	0.000202706	6.83279e-05
Eggerthella_lenta	6.70067e-05	6.83279e-05
Prevotella_sp__P6B1	5.52068e-05	6.83279e-05
Clostridium_akagii	5.26782e-05	6.83279e-05
Bilifractor_porci	4.93068e-05	6.83279e-05
Clostridium_puniceum	3.37141e-05	6.83279e-05
Acetivibrio_sp__MSJd_27	0.000127271	6.71891e-05
Botrytis_porri	9.94565e-05	6.71891e-05
Tenuifilum_thalassicum	8.38638e-05	6.71891e-05
Prevotella_sp__oral_taxon_317	7.24853e-05	6.71891e-05
Clostridium_sp__LS	3.16069e-05	6.71891e-05
Bacteroides_sp__AF34_31BH	2.02284e-05	6.71891e-05
Collinsella_sp__AM41_2BH	8.8078e-05	6.60503e-05
Bacteroides_graminisolvens	4.71997e-05	6.60503e-05
Prevotella_fusca	4.00355e-05	6.60503e-05
Rothia_dentocariosa	3.16069e-05	6.60503e-05
Butyrivibrio_sp__VCD2006	3.11855e-05	6.60503e-05
Rhizophagus_irregularis	2.65498e-05	6.60503e-05
Bacteroides_intestinalis	0.000285305	6.49115e-05
Alistipes_onderdonkii	0.000137806	6.49115e-05
Clostridium_tetani	0.000100299	6.49115e-05
Phocaeicola_paurosaccharolyticus	7.16424e-05	6.49115e-05
Bittarella_massiliensis	5.56282e-05	6.49115e-05
Parabacteroides_sp__TM07_1AC	5.01497e-05	6.49115e-05
Enterocloster_clostridioformis	3.32927e-05	6.49115e-05
Streptomyces_sp__MG62	2.2757e-05	6.49115e-05
Bacteroides_sp__AM41_16	9.43994e-05	6.37728e-05
Prevotella_loescheii	7.37495e-05	6.37728e-05
Clostridium_sp__C5_48	7.33281e-05	6.37728e-05
Roseburia_sp__AM51_8	6.65853e-05	6.37728e-05
Clostridium_tarantellae	6.36353e-05	6.37728e-05
Prevotella_sp__P5_50	3.53998e-05	6.37728e-05
Clostridium_sp__AF50_3	8.30209e-05	6.2634e-05
Senegalia_massiliensis	8.13352e-05	6.2634e-05
Ethanoligenens_harbinense	5.81568e-05	6.2634e-05
Butyrivibrio_sp__AE2032	5.68925e-05	6.2634e-05
Prevotella_sp__lc2012	4.21426e-05	6.2634e-05
Eubacterium_sp__An11	3.66641e-05	6.2634e-05
Prevotella_pallens	0.000101564	6.14952e-05
Mediterranea_massiliensis	8.00709e-05	6.14952e-05
Holdemanella_sp__L34	5.85782e-05	6.14952e-05
Faecalibacterium_sp__AF10_46	5.81568e-05	6.14952e-05
Staphylococcus_simulans	2.19142e-05	6.14952e-05
Bacteroides_acidifaciens	5.47854e-06	6.14952e-05
Dorea_sp__5_2	6.57425e-05	6.03564e-05
Coprococcus_sp__CLA_AA_H212	4.50926e-05	6.03564e-05
Anaerosporobacter_mobilis	3.70855e-05	6.03564e-05
Clostridium_algidicarnis	3.70855e-05	6.03564e-05
Streptococcus_rubneri	1.6857e-05	6.03564e-05
Prevotella_stercorea	4.21426e-06	6.03564e-05
Clostridium_sp__OM02_18AC	6.27925e-05	5.92176e-05
Clostridium_thailandense	5.73139e-05	5.92176e-05
Eubacterium_uniforme	4.50926e-05	5.92176e-05
Roseburia_sp__AM16_25	4.38283e-05	5.92176e-05
Ruminococcus_sp__1001713B170207_170306_F1	3.87712e-05	5.92176e-05
Clostridium_populeti	3.20284e-05	5.92176e-05
Prevotella_aff__ruminicola_Tc2_24	3.07641e-05	5.92176e-05
Faecalibacterium_sp__CLA_AA_H233	1.39071e-05	5.92176e-05
Ruminococcus_sp__AM31_15AC	8.00709e-05	5.80788e-05
Sanguibacteroides_justesenii	5.64711e-05	5.80788e-05
Clostridium_tertium	4.97283e-05	5.80788e-05
Blautia_sp__OM05_6	4.42497e-05	5.80788e-05
Butyricimonas_paravirosa	3.9614e-05	5.80788e-05
Vibrio_splendidus	3.87712e-05	5.80788e-05
Pararoseburia_lenta	3.79283e-05	5.80788e-05
Blautia_pseudococcoides	3.32927e-05	5.80788e-05
Bacteroides_sp__AM56_10ce	1.34856e-05	5.80788e-05
Mitsuokella_multacida	1.09571e-05	5.80788e-05
Colidextribacter_sp__OB_20	0.000132328	5.694e-05
Shigella_boydii	9.6928e-05	5.694e-05
Clostridium_sp__BX14	7.79638e-05	5.694e-05
Tyzzerella_nexilis	6.65853e-05	5.694e-05
Clostridium_cavendishii	5.77354e-05	5.58012e-05
Gordonibacter_urolithinfaciens	5.01497e-05	5.58012e-05
Lactonifactor_longoviformis	4.50926e-05	5.58012e-05
Faecalibacterium_sp__An121	2.94998e-05	5.58012e-05
Hyaloscypha_bicolor	2.69713e-05	5.58012e-05
Prevotella_sp__BP1_148	7.7121e-05	5.46624e-05
Prevotella_sp__oral_taxon_306	7.16424e-05	5.46624e-05
Prevotella_sp__KH2C16	6.78496e-05	5.46624e-05
Clostridium_sp__AF37_5AT	5.18354e-05	5.46624e-05
Butyrivibrio_sp__MC2021	5.1414e-05	5.46624e-05
Clostridium_sp__C2_6_12	2.48641e-05	5.46624e-05
Blautia_hansenii	2.35999e-05	5.46624e-05
Coprococcus_sp__TF11_13	1.81213e-05	5.46624e-05
Bifidobacterium_moukalabense	1.81213e-05	5.46624e-05
Lachnoclostridium_edouardi	0.000104514	5.35236e-05
Clostridium_sp__OM05_5BH	9.52423e-05	5.35236e-05
Eubacterium_sp__AM49_13BH	6.78496e-05	5.35236e-05
Butyricicoccus_sp__AM18_35	6.65853e-05	5.35236e-05
Ruminococcus_sp__AM42_11	5.01497e-05	5.35236e-05
Bacteroides_sp__214	3.83498e-05	5.35236e-05
Candidatus_Frankia_datiscae	2.06499e-05	5.35236e-05
Bacteroides_sp__NM69_E16B	1.93856e-05	5.35236e-05
Blautia_luti	1.93856e-05	5.35236e-05
Intestinibacillus_sp__Marseille_P6563	0.000126849	5.23848e-05
Prevotella_brevis	9.81923e-05	5.23848e-05
Tannerella_forsythia	7.92281e-05	5.23848e-05
Lacrimispora_amygdalina	7.03781e-05	5.23848e-05
Clostridium_porci	6.86924e-05	5.23848e-05
Heterostelium_album	6.32139e-05	5.23848e-05
Prevotella_oralis	3.87712e-05	5.23848e-05
Oliverpabstia_intestinalis	3.45569e-05	5.23848e-05
Roseburia_sp__AF25_25LB	3.24498e-05	5.23848e-05
Coprobacter_fastidiosus	3.16069e-05	5.23848e-05
Streptomyces_gancidicus	2.44427e-05	5.23848e-05
Roseburia_faecis	7.16424e-06	5.23848e-05
Flavobacterium_columnare	0.000127271	5.1246e-05
Prevotella_sp__tf2_5	0.000125164	5.1246e-05
Clostridium_sp__AM49_4BH	0.000113785	5.1246e-05
Mammaliicoccus_sciuri	0.000109992	5.1246e-05
Acetatifactor_muris	7.37495e-05	5.1246e-05
Blautia_sp__BX19	5.4364e-05	5.1246e-05
Eubacterium_sp__AM46_8	4.38283e-05	5.1246e-05
Clostridium_sp__Marseille_P3244	3.16069e-05	5.1246e-05
Acetivibrio_ethanolgignens	2.48641e-05	5.1246e-05
Flavonifractor_sp__An82	0.000105778	5.01072e-05
Blautia_sp__AM47_4	5.85782e-05	5.01072e-05
Trypanosoma_conorhini	4.59354e-05	5.01072e-05
Tamlana_crocina	4.00355e-05	5.01072e-05
Botrytis_byssoidea	3.03427e-05	5.01072e-05
Carnobacterium_maltaromaticum	2.8657e-05	5.01072e-05
Escherichia_sp__E4742	2.44427e-05	5.01072e-05
Ruminococcus_torques	1.55928e-05	5.01072e-05
Sutterella_massiliensis	8.47066e-05	4.89684e-05
Franconibacter_helveticus	7.24853e-05	4.89684e-05
Prevotella_herbatica	5.4364e-05	4.89684e-05
Bacillus_luti	4.42497e-05	4.89684e-05
Clostridium_culturomicium	4.17212e-05	4.89684e-05
Butyricicoccus_sp__AF22_28AC	2.5707e-05	4.89684e-05
Blautia_sp__MCC289	2.40213e-05	4.89684e-05
Lacticaseibacillus_paracasei	2.19142e-05	4.89684e-05
Roseburia_sp__1XD42_69	2.19142e-05	4.89684e-05
Fusicatenibacter_sp__CLA_AA_H277	1.81213e-05	4.89684e-05
Bacteroides_finegoldii	1.17999e-05	4.89684e-05
Oscillibacter_ruminantium	0.00026297	4.78296e-05
Blautia_marasmi	6.91139e-05	4.78296e-05
Peptostreptococcus_anaerobius	6.57425e-05	4.78296e-05
Duncaniella_freteri	6.11068e-05	4.78296e-05
Bacteroides_propionicifaciens	5.68925e-05	4.78296e-05
Veillonella_sp__S12025_13	4.67783e-05	4.78296e-05
Clostridium_sp__1001270J_160509_D11	4.38283e-05	4.78296e-05
Clostridium_sp__AF20_17LB	4.21426e-05	4.78296e-05
Bacteroides_sp__HMSC073E02	3.75069e-05	4.78296e-05
Prevotella_saccharolytica	3.53998e-05	4.78296e-05
Butyricicoccus_sp__AF15_40	2.99212e-05	4.78296e-05
Butyrivibrio_sp__AE3009	2.90784e-05	4.78296e-05
Parabacteroides_johnsonii	1.85427e-05	4.78296e-05
Falcatimonas_sp__MSJ_15	1.6857e-05	4.78296e-05
Anaerotignum_sp__MSJ_24	0.000669224	4.66908e-05
Arcanobacterium_phocae	6.57425e-05	4.66908e-05
Caproiciproducens_galactitolivorans	5.30997e-05	4.66908e-05
Butyricicoccus_sp__OF13_6	4.97283e-05	4.66908e-05
Prevotella_micans	4.08783e-05	4.66908e-05
Plasmodium_gonderi	3.9614e-05	4.66908e-05
Bacteroides_sp__MSK_17_76	2.23356e-05	4.66908e-05
Salifodinibacter_halophilus	2.19142e-05	4.66908e-05
Enterococcus_raffinosus	1.72785e-05	4.66908e-05
Anaerofustis_stercorihominis	5.98425e-05	4.5552e-05
Intestinimonas_timonensis	4.71997e-05	4.5552e-05
Terrisporobacter_glycolicus	4.63569e-05	4.5552e-05
Clostridium_sp__HBUAS56010	4.50926e-05	4.5552e-05
Plasmodium_malariae	3.16069e-05	4.5552e-05
Ruminococcus_sp__AF14_5	3.03427e-05	4.5552e-05
Chromatium_weissei	2.82355e-05	4.5552e-05
Fusobacterium_nucleatum	2.82355e-05	4.5552e-05
Citrobacter_koseri	2.82355e-05	4.5552e-05
Botrytis_sinoallii	2.5707e-05	4.5552e-05
Lachnospira_pectinoschiza	9.6928e-06	4.5552e-05
Ruminococcus_gnavus	9.27137e-06	4.5552e-05
Olsenella_sp__GAM18	7.29067e-05	4.44132e-05
Flintibacter_sp__NSJ_23	6.95353e-05	4.44132e-05
Moraxella_osloensis	6.78496e-05	4.44132e-05
Collinsella_sp__TM06_3	5.85782e-05	4.44132e-05
Mediterraneibacter_massiliensis	4.8464e-05	4.44132e-05
Bacteroides_togonis	2.69713e-05	4.44132e-05
Holdemania_massiliensis	2.48641e-05	4.44132e-05
Clostridium_thermobutyricum	2.23356e-05	4.44132e-05
Veillonella_sp__S13053_19	2.02284e-05	4.44132e-05
Catenibacterium_sp__NSJ_22	1.51713e-05	4.44132e-05
Desulfotomaculum_sp__OF05_3	8.17566e-05	4.32744e-05
Lachnoclostridium_sp__An169	7.62781e-05	4.32744e-05
Prevotella_sp__P4_98	2.5707e-05	4.32744e-05
Alistipes_senegalensis	2.06499e-05	4.32744e-05
Clostridium_sp__L2_50	1.64356e-05	4.32744e-05
Blautia_sp__MSJ_9	1.26428e-05	4.32744e-05
Butyrivibrio_crossotus	8.42852e-06	4.32744e-05
Vagococcus_fluvialis	0.000108306	4.21356e-05
Collinsella_sp__AM17_1	9.81923e-05	4.21356e-05
Rossellomorea_aquimaris	8.93423e-05	4.21356e-05
Clostridium_saccharoperbutylacetonicum	5.1414e-05	4.21356e-05
Butyrivibrio_hungatei	3.66641e-05	4.21356e-05
Prevotella_sp__oral_taxon_376	3.16069e-05	4.21356e-05
Riemerella_anatipestifer	2.61284e-05	4.21356e-05
Candidatus_Pelagibacter_ubique	8.30209e-05	4.09968e-05
Agathobaculum_sp__M2	6.27925e-05	4.09968e-05
Butyricicoccus_sp__AF24_19AC	5.1414e-05	4.09968e-05
Blattabacterium_cuenoti	4.21426e-05	4.09968e-05
Paecilomyces_variotii	2.99212e-05	4.09968e-05
Pedobacter_panaciterrae	2.82355e-05	4.09968e-05
Enterobacter_soli	2.73927e-05	4.09968e-05
Blautia_sp__MSJ_36	2.61284e-05	4.09968e-05
Nostoc_sp__UCD122	2.10713e-05	4.09968e-05
Streptococcus_vestibularis	1.64356e-05	4.09968e-05
Phocaeicola_coprocola	1.17999e-05	4.09968e-05
Fournierella_massiliensis	6.61639e-05	3.9858e-05
Bradyrhizobium_canariense	3.9614e-05	3.9858e-05
Veillonella_infantium	3.79283e-05	3.9858e-05
Acetitomaculum_ruminis	3.75069e-05	3.9858e-05
Raoultella_sp__BIGb0138	3.41355e-05	3.9858e-05
Raoultella_ornithinolytica	3.20284e-05	3.9858e-05
Cytobacillus_oceanisediminis	3.07641e-05	3.9858e-05
Bacteroides_sp__Marseille_P3684	2.94998e-05	3.9858e-05
Clostridium_sp__AF32_12BH	2.78141e-05	3.9858e-05
Tyzzerella_sp__An114	2.44427e-05	3.9858e-05
Streptococcus_cristatus	2.35999e-05	3.9858e-05
Parvimonas_micra	2.2757e-05	3.9858e-05
Bacteroides_sp__AF39_16AC	7.4171e-05	3.87192e-05
Streptococcus_anginosus	6.15282e-05	3.87192e-05
Clostridium_weizhouense	5.94211e-05	3.87192e-05
Collinsella_sp__AM16_21	4.71997e-05	3.87192e-05
Prevotella_enoeca	4.12997e-05	3.87192e-05
Serratia_fonticola	3.49784e-05	3.87192e-05
Blautia_sp__AF34_10	3.45569e-05	3.87192e-05
Clostridium_sp__AM46_21	3.16069e-05	3.87192e-05
Veillonella_dispar	2.90784e-05	3.87192e-05
Bacteroides_sp__519	2.69713e-05	3.87192e-05
Clostridium_sp__Marseille_P299	2.61284e-05	3.87192e-05
Pseudomonas_fluorescens	2.44427e-05	3.87192e-05
Butyrivibrio_sp__CB08	2.35999e-05	3.87192e-05
Fusicatenibacter_sp__CLA_AA_H213	2.02284e-05	3.87192e-05
Blautia_faecis	1.6857e-05	3.87192e-05
Bifidobacterium_dentium	1.51713e-05	3.87192e-05
Ligilactobacillus_salivarius	1.09571e-05	3.87192e-05
Anaerobium_acetethylicum	4.8464e-05	3.75804e-05
Porphyromonas_levii	4.63569e-05	3.75804e-05
Clostridium_tyrobutyricum	4.59354e-05	3.75804e-05
Clostridium_moniliforme	4.38283e-05	3.75804e-05
Bacteroides_sp__3_1_40A	4.00355e-05	3.75804e-05
Prevotella_colorans	3.79283e-05	3.75804e-05
Alistipes_sp__An66	3.70855e-05	3.75804e-05
Parolsenella_catena	3.70855e-05	3.75804e-05
Lacrimispora_celerecrescens	3.70855e-05	3.75804e-05
Campylobacter_upsaliensis	3.24498e-05	3.75804e-05
Roseburia_sp__OF03_24	2.35999e-05	3.75804e-05
Streptococcus_sp__263_SSPC	2.31784e-05	3.75804e-05
Pasteurella_multocida	2.2757e-05	3.75804e-05
Pseudobutyrivibrio_xylanivorans	2.14927e-05	3.75804e-05
Roseburia_sp__499	1.85427e-05	3.75804e-05
Streptococcus_infantis	1.76999e-05	3.75804e-05
Ligilactobacillus_ruminis	5.89996e-06	3.75804e-05
Prevotella_rara	0.000119264	3.64416e-05
Bacteroides_sp__AF32_15BH	7.75424e-05	3.64416e-05
Aliarcobacter_butzleri	5.77354e-05	3.64416e-05
Xanthomonas_campestris	4.97283e-05	3.64416e-05
Collinsella_sp__KGMB02528	4.76211e-05	3.64416e-05
Clostridium_vincentii	4.71997e-05	3.64416e-05
Butyrivibrio_sp__WCD3002	4.63569e-05	3.64416e-05
Cronobacter_dublinensis	4.12997e-05	3.64416e-05
Eubacterium_sp__MSJ_13	3.11855e-05	3.64416e-05
Dialister_invisus	2.82355e-05	3.64416e-05
Alistipes_timonensis	2.78141e-05	3.64416e-05
Fusicatenibacter_sp__CLA_AA_H241	2.40213e-05	3.64416e-05
Bacillus_amyloliquefaciens	2.40213e-05	3.64416e-05
Blautia_obeum	2.23356e-05	3.64416e-05
Legionella_pneumophila	2.23356e-05	3.64416e-05
Kluyvera_genomosp__3	2.10713e-05	3.64416e-05
Megasphaera_sp__NM10	1.89642e-05	3.64416e-05
Veillonella_atypica	1.55928e-05	3.64416e-05
Bacteroides_zhangwenhongii	1.47499e-05	3.64416e-05
Streptococcus_pneumoniae	1.39071e-05	3.64416e-05
Bacteroides_congonensis	7.16424e-06	3.64416e-05
Gemmiger_gallinarum	9.22923e-05	3.53028e-05
Phascolarctobacterium_faecium	6.91139e-05	3.53028e-05
Clostridium_massiliamazoniense	4.21426e-05	3.53028e-05
Prevotella_marshii	3.37141e-05	3.53028e-05
Merdimonas_faecis	3.28712e-05	3.53028e-05
Prevotella_vespertina	3.28712e-05	3.53028e-05
Pluralibacter_gergoviae	3.16069e-05	3.53028e-05
Pseudomonas_putida	3.11855e-05	3.53028e-05
Alcaligenes_faecalis	2.8657e-05	3.53028e-05
Dictyostelium_discoideum	2.82355e-05	3.53028e-05
Pseudobutyrivibrio_sp__MD2005	2.52856e-05	3.53028e-05
Mycobacteroides_abscessus	2.2757e-05	3.53028e-05
Ruminococcus_sp__AM16_34	2.14927e-05	3.53028e-05
Blautia_sp__M29	1.85427e-05	3.53028e-05
Streptococcus_pseudopneumoniae	1.64356e-05	3.53028e-05
Clostridioides_difficile	1.60142e-05	3.53028e-05
Prevotellamassilia_timonensis	1.22214e-05	3.53028e-05
Prevotella_bivia	0.000958323	3.4164e-05
Prevotella_salivae	4.8464e-05	3.4164e-05
Priestia_megaterium	3.41355e-05	3.4164e-05
Phycomyces_blakesleeanus	3.11855e-05	3.4164e-05
Pseudomonas_shirazica	2.31784e-05	3.4164e-05
Pseudomonas_stutzeri	2.06499e-05	3.4164e-05
Lactobacillus_gasseri	2.02284e-05	3.4164e-05
Plasmodium_vivax	1.85427e-05	3.4164e-05
Romboutsia_ilealis	1.64356e-05	3.4164e-05
Clostridium_sp__AF36_18BH	1.39071e-05	3.4164e-05
Blautia_faecicola	1.34856e-05	3.4164e-05
Pseudomonas_aeruginosa	1.30642e-05	3.4164e-05
Ruminococcus_callidus	9.6928e-06	3.4164e-05
Sporofaciens_musculi	6.06853e-05	3.30252e-05
Bacteroides_sp__AF33_23	4.42497e-05	3.30252e-05
Mediterraneibacter_sp__NSJ_55	3.45569e-05	3.30252e-05
Catonella_massiliensis	3.03427e-05	3.30252e-05
Melampsora_larici_populina	2.94998e-05	3.30252e-05
Prevotella_buccae	2.78141e-05	3.30252e-05
Bacillus_pseudomycoides	2.73927e-05	3.30252e-05
Faecalibacterium_sp__An58	2.69713e-05	3.30252e-05
Clostridium_sp__AM16_23	2.52856e-05	3.30252e-05
Acidaminococcus_massiliensis	2.48641e-05	3.30252e-05
Streptococcus_pyogenes	2.31784e-05	3.30252e-05
Candidatus_Galacturonibacter_soehngenii	2.19142e-05	3.30252e-05
Blautia_sp__BCRC_81119	1.85427e-05	3.30252e-05
Pseudonocardia_sp__EV170527_09	1.72785e-05	3.30252e-05
Blautia_sp__MSK22_86	1.51713e-05	3.30252e-05
Roseburia_sp__831b	1.43285e-05	3.30252e-05
Dorea_longicatena	9.27137e-06	3.30252e-05
Bacillus_wiedmannii	5.60497e-05	3.18864e-05
Parabacteroides_sp__AM08_6	5.52068e-05	3.18864e-05
Mediterranea_sp__An20	4.08783e-05	3.18864e-05
Pseudobutyrivibrio_sp__OR37	4.00355e-05	3.18864e-05
Shigella_dysenteriae	3.58212e-05	3.18864e-05
Eubacterium_plexicaudatum	3.58212e-05	3.18864e-05
Prevotella_sp__oral_taxon_472	3.24498e-05	3.18864e-05
Butyricimonas_vaginalis	3.07641e-05	3.18864e-05
Phocaeicola_faecicola	2.73927e-05	3.18864e-05
Bacteroides_luti	2.52856e-05	3.18864e-05
Pseudomonas_sp__2822_17	2.52856e-05	3.18864e-05
Neisseria_meningitidis	2.40213e-05	3.18864e-05
Clostridium_sp__SM_530_WT_3G	2.31784e-05	3.18864e-05
Virgibacillus_profundi	2.06499e-05	3.18864e-05
Kluyvera_ascorbata	2.02284e-05	3.18864e-05
Butyricicoccus_faecihominis	1.93856e-05	3.18864e-05
Bacteroides_pyogenes	1.60142e-05	3.18864e-05
Bacteroides_sp__1_1_30	1.55928e-05	3.18864e-05
Veillonella_parvula	6.74282e-06	3.18864e-05
Lachnoclostridium_sp__MSJ_17	5.64711e-05	3.07476e-05
Clostridium_sp__Marseille_P2415	4.34069e-05	3.07476e-05
Clostridium_sp__DSM_8431	3.9614e-05	3.07476e-05
Ruminococcus_sp__OF02_6	3.58212e-05	3.07476e-05
Burkholderia_cenocepacia	3.45569e-05	3.07476e-05
Trypanosoma_cruzi	3.24498e-05	3.07476e-05
Candidatus_Nanosynbacter_sp__HMT352	3.20284e-05	3.07476e-05
Streptococcus_intermedius	2.8657e-05	3.07476e-05
Achromobacter_ruhlandii	2.8657e-05	3.07476e-05
Leptomonas_pyrrhocoris	2.8657e-05	3.07476e-05
Capnocytophaga_canimorsus	2.82355e-05	3.07476e-05
Bacillus_subtilis	2.78141e-05	3.07476e-05
Blautia_sp__AF22_5LB	2.73927e-05	3.07476e-05
Eubacterium_sp__BX4	2.31784e-05	3.07476e-05
Enterobacter_mori	2.02284e-05	3.07476e-05
Dorea_sp__Marseille_P4042	1.93856e-05	3.07476e-05
Limosilactobacillus_reuteri	1.76999e-05	3.07476e-05
Veillonella_sp__3_1_44	1.6857e-05	3.07476e-05
Roseburia_sp__NSJ_69	1.6857e-05	3.07476e-05
Clostridium_sp__Marseille_P7770	1.64356e-05	3.07476e-05
Streptococcus_mutans	1.39071e-05	3.07476e-05
Veillonella_ratti	6.32139e-06	3.07476e-05
Pseudoalteromonas_luteoviolacea	0.000107885	2.96088e-05
Eubacterium_sp__OM08_24	9.14494e-05	2.96088e-05
Blautia_sp__OF03_15BH	8.13352e-05	2.96088e-05
Anaerocolumna_xylanovorans	4.88854e-05	2.96088e-05
Eubacterium_sp__14_2	4.5514e-05	2.96088e-05
Bacteroides_sp__14(A)	4.2564e-05	2.96088e-05
Eisenbergiella_porci	3.75069e-05	2.96088e-05
Clostridium_sp__OF09_36	3.70855e-05	2.96088e-05
Blautia_sp__DFI_9_9	3.37141e-05	2.96088e-05
Trichomonas_vaginalis	3.32927e-05	2.96088e-05
Clostridium_sp__OF10_22XD	2.99212e-05	2.96088e-05
Clostridium_sp__KNHs205	2.94998e-05	2.96088e-05
Cavenderia_fasciculata	2.48641e-05	2.96088e-05
Clostridium_sp__AF36_4	2.31784e-05	2.96088e-05
Olsenella_sp__Marseille_P4518	2.19142e-05	2.96088e-05
Enterobacter_ludwigii	1.85427e-05	2.96088e-05
Toxoplasma_gondii	1.55928e-05	2.96088e-05
Faecalibacterium_sp__Marseille_Q3530	1.17999e-05	2.96088e-05
Enterobacter_cloacae	1.13785e-05	2.96088e-05
Catenibacterium_mitsuokai	1.09571e-05	2.96088e-05
Bacteroides_sp__CBA7301	2.10713e-06	2.96088e-05
Faecalibacterium_sp__CLA_AA_H223	4.88854e-05	2.847e-05
Anaeromassilibacillus_sp__An200	4.76211e-05	2.847e-05
Ruminococcus_sp__AM40_10AC	4.71997e-05	2.847e-05
Clostridium_estertheticum	4.2564e-05	2.847e-05
Paenibacillus_xylanexedens	3.41355e-05	2.847e-05
Senegalimassilia_faecalis	3.32927e-05	2.847e-05
Faecalibacterium_sp__CLA_AA_H283	3.07641e-05	2.847e-05
Faecalibacterium_sp__Marseille_Q0746	2.78141e-05	2.847e-05
Macrococcus_caseolyticus	2.78141e-05	2.847e-05
Blautia_sp__AF19_10LB	2.61284e-05	2.847e-05
Ligilactobacillus_agilis	2.44427e-05	2.847e-05
Serratia_marcescens	2.2757e-05	2.847e-05
Enterobacter_cancerogenus	2.02284e-05	2.847e-05
Enterobacter_chuandaensis	1.81213e-05	2.847e-05
Pseudomonas_syringae	1.60142e-05	2.847e-05
Alistipes_shahii	1.39071e-05	2.847e-05
Bacteroides_caecimuris	1.09571e-05	2.847e-05
Bacteroides_uniformis	8.84995e-06	2.847e-05
Clostridium_taeniosporum	7.66995e-05	2.73312e-05
Collinsella_sp__AM13_34	4.71997e-05	2.73312e-05
Ruminococcus_sp__AF14_10	3.70855e-05	2.73312e-05
Clostridium_sp__MCC353	3.53998e-05	2.73312e-05
Luxibacter_massiliensis	3.24498e-05	2.73312e-05
Clostridium_sp__MCC328	2.78141e-05	2.73312e-05
Acytostelium_subglobosum	2.40213e-05	2.73312e-05
Escherichia_sp__MOD1_EC7003	2.23356e-05	2.73312e-05
Klebsiella_grimontii	2.10713e-05	2.73312e-05
Bilophila_sp__4_1_30	2.06499e-05	2.73312e-05
Bacillus_velezensis	2.02284e-05	2.73312e-05
Paenibacillus_odorifer	1.9807e-05	2.73312e-05
Bacteroides_heparinolyticus	1.93856e-05	2.73312e-05
Faecalibacterium_sp__AF27_11BH	1.85427e-05	2.73312e-05
Bacteroides_bouchesdurhonensis	1.39071e-05	2.73312e-05
Bacteroides_faecalis	1.17999e-05	2.73312e-05
Phascolarctobacterium_succinatutens	1.13785e-05	2.73312e-05
Klebsiella_pneumoniae	9.27137e-06	2.73312e-05
Aliivibrio_fischeri	4.21426e-05	2.61924e-05
Clostridium_sp__Sa3CUN1	3.70855e-05	2.61924e-05
Lachnoclostridium_phytofermentans	3.37141e-05	2.61924e-05
Butyrivibrio_fibrisolvens	3.37141e-05	2.61924e-05
Bacteroides_sp__4_3_47FAA	2.94998e-05	2.61924e-05
Alloprevotella_sp__Lung230	2.5707e-05	2.61924e-05
Mitsuokella_sp__AF33_22	2.44427e-05	2.61924e-05
Blautia_sp__DFI_4_84	2.35999e-05	2.61924e-05
Megasphaera_massiliensis	2.31784e-05	2.61924e-05
Clostridium_sp__AF28_12	2.23356e-05	2.61924e-05
Bacteroides_ihuae	2.19142e-05	2.61924e-05
Roseburia_sp__AF42_8	1.93856e-05	2.61924e-05
Escherichia_fergusonii	1.85427e-05	2.61924e-05
Nocardia_cyriacigeorgica	1.72785e-05	2.61924e-05
Bacteroides_rodentium	1.43285e-05	2.61924e-05
Prevotella_sp__PTAC	7.88067e-05	2.50536e-05
Atlantibacter_hermannii	4.63569e-05	2.50536e-05
Dorea_phocaeensis	3.79283e-05	2.50536e-05
Candida_tropicalis	3.58212e-05	2.50536e-05
Faecalibacterium_sp__An192	2.90784e-05	2.50536e-05
Hespellia_stercorisuis	2.78141e-05	2.50536e-05
Dialister_micraerophilus	2.73927e-05	2.50536e-05
Bacillus_mycoides	2.65498e-05	2.50536e-05
Schaedlerella_arabinosiphila	2.52856e-05	2.50536e-05
Clostridium_sp__MCC345	2.48641e-05	2.50536e-05
Bacteroides_neonati	2.2757e-05	2.50536e-05
Pseudomonas_sp__79_C	2.14927e-05	2.50536e-05
Bacteroides_sp__51	2.10713e-05	2.50536e-05
Roseburia_sp__AM23_20	2.02284e-05	2.50536e-05
Turicibacter_sanguinis	1.9807e-05	2.50536e-05
Lachnobacterium_bovis	1.93856e-05	2.50536e-05
Intestinibacter_bartlettii	1.76999e-05	2.50536e-05
Eubacterium_sp__TM05_53	1.64356e-05	2.50536e-05
Gemella_sanguinis	1.51713e-05	2.50536e-05
Lactobacillus_crispatus	1.30642e-05	2.50536e-05
Ruminococcus_sp__BSD2780120874_150323_B10	1.17999e-05	2.50536e-05
Brachyspira_pilosicoli	7.58567e-06	2.50536e-05
Alloprevotella_rava	4.71997e-05	2.39148e-05
Collinsella_sp__TF05_9AC	4.00355e-05	2.39148e-05
Butyricicoccus_sp__AF10_3	3.41355e-05	2.39148e-05
Naegleria_gruberi	2.8657e-05	2.39148e-05
Candida_dubliniensis	2.61284e-05	2.39148e-05
Glaesserella_parasuis	2.40213e-05	2.39148e-05
Lachnoclostridium_sp__An76	2.35999e-05	2.39148e-05
Mediterraneibacter_sp__210702_DFI_3_120	2.2757e-05	2.39148e-05
Aequorivita_lutea	2.06499e-05	2.39148e-05
Mediterraneibacter_glycyrrhizinilyticus	2.06499e-05	2.39148e-05
Faecalimonas_umbilicata	2.02284e-05	2.39148e-05
Bacteroides_stercorirosoris	1.9807e-05	2.39148e-05
Bacteroides_fluxus	1.6857e-05	2.39148e-05
Bacteroides_reticulotermitis	1.6857e-05	2.39148e-05
Coprococcus_sp__AF16_5	1.6857e-05	2.39148e-05
Blautia_producta	1.55928e-05	2.39148e-05
Faecalibacterium_sp__OM04_11BH	1.51713e-05	2.39148e-05
Listeria_monocytogenes	1.51713e-05	2.39148e-05
Bacillus_cereus	1.43285e-05	2.39148e-05
Acidaminococcus_fermentans	1.22214e-05	2.39148e-05
Lachnoclostridium_sp__210928_DFI_6_3	1.13785e-05	2.39148e-05
Not_Assigned	1.13785e-05	2.39148e-05
Acinetobacter_baumannii	8.42852e-06	2.39148e-05
Escherichia_coli	8.00709e-06	2.39148e-05
Clostridium_sp__JN_9	8.42852e-05	2.2776e-05
Prevotella_paludivivens	5.05711e-05	2.2776e-05
Catonella_morbi	3.87712e-05	2.2776e-05
Prevotella_albensis	3.53998e-05	2.2776e-05
Dorea_sp__BIOML_A1	3.41355e-05	2.2776e-05
Clostridium_sp__OF09_10	2.99212e-05	2.2776e-05
Sclerotinia_sclerotiorum	2.82355e-05	2.2776e-05
Clostridium_sp__NSJ_6	2.82355e-05	2.2776e-05
Sellimonas_intestinalis	2.73927e-05	2.2776e-05
Bacteroides_timonensis	2.35999e-05	2.2776e-05
Velocimicrobium_porci	2.2757e-05	2.2776e-05
Klebsiella_quasivariicola	2.19142e-05	2.2776e-05
Bacillus_toyonensis	1.9807e-05	2.2776e-05
Barnesiella_sp__GGCC_0306	1.9807e-05	2.2776e-05
Pseudobutyrivibrio_ruminis	1.81213e-05	2.2776e-05
Bifidobacterium_breve	1.76999e-05	2.2776e-05
Luteimonas_granuli	1.72785e-05	2.2776e-05
Streptococcus_gordonii	1.6857e-05	2.2776e-05
Roseburia_sp__AF20_18LB	1.6857e-05	2.2776e-05
Faecalibacterium_longum	1.55928e-05	2.2776e-05
Clostridium_sp__AF27_2AA	1.47499e-05	2.2776e-05
Streptococcus_lutetiensis	1.43285e-05	2.2776e-05
Bacteroides_sp__3_1_23	1.39071e-05	2.2776e-05
Blautia_wexlerae	1.34856e-05	2.2776e-05
Megamonas_rupellensis	1.34856e-05	2.2776e-05
Bifidobacterium_adolescentis	1.13785e-05	2.2776e-05
Roseburia_sp__BX1005	1.13785e-05	2.2776e-05
Haemophilus_pittmaniae	1.05356e-05	2.2776e-05
Romboutsia_timonensis	1.01142e-05	2.2776e-05
Acanthamoeba_castellanii	7.92281e-05	2.16372e-05
Blautia_sp__Marseille_P3087	3.75069e-05	2.16372e-05
Candidatus_Minimicrobia_vallesae	3.07641e-05	2.16372e-05
Gilliamella_apicola	2.82355e-05	2.16372e-05
Mediterraneibacter_butyricigenes	2.52856e-05	2.16372e-05
Blautia_sp__Marseille_P3201T	2.52856e-05	2.16372e-05
Lachnoanaerobaculum_saburreum	2.44427e-05	2.16372e-05
Bacteroides_sp__4_1_36	2.40213e-05	2.16372e-05
Ichthyophthirius_multifiliis	2.40213e-05	2.16372e-05
Clostridium_saccharobutylicum	2.31784e-05	2.16372e-05
Lactiplantibacillus_plantarum	2.31784e-05	2.16372e-05
Moraxella_catarrhalis	2.2757e-05	2.16372e-05
Clostridium_sp__OM05_9	2.14927e-05	2.16372e-05
IAS_virus	2.14927e-05	2.16372e-05
Butyrivibrio_proteoclasticus	2.06499e-05	2.16372e-05
Roseburia_sp__MSJ_14	1.85427e-05	2.16372e-05
Eubacterium_ramulus	1.55928e-05	2.16372e-05
Actinomyces_graevenitzii	1.55928e-05	2.16372e-05
Clostridium_sp__AM34_9AC	1.47499e-05	2.16372e-05
Holdemanella_porci	1.47499e-05	2.16372e-05
Ruminococcus_lactaris	1.39071e-05	2.16372e-05
Clostridium_sp__AM27_31LB	1.30642e-05	2.16372e-05
Prevotella_melaninogenica	5.73139e-05	2.04984e-05
Ruminococcus_sp__AM32_17LB	4.63569e-05	2.04984e-05
Clostridium_sp__E02	4.38283e-05	2.04984e-05
Eubacterium_callanderi	3.9614e-05	2.04984e-05
Prevotella_denticola	3.79283e-05	2.04984e-05
Agathobaculum_desmolans	3.16069e-05	2.04984e-05
Megasphaera_sp__DISK_18	3.03427e-05	2.04984e-05
Butyrivibrio_sp__AE3004	3.03427e-05	2.04984e-05
Clostridium_sp__MCC334	2.8657e-05	2.04984e-05
Staphylococcus_saprophyticus	2.73927e-05	2.04984e-05
Ruminococcus_sp__AM33_14	2.40213e-05	2.04984e-05
Clostridium_sp__AWRP	2.40213e-05	2.04984e-05
Enterococcus_casseliflavus	2.35999e-05	2.04984e-05
Prevotella_baroniae	2.35999e-05	2.04984e-05
Modestobacter_deserti	2.2757e-05	2.04984e-05
Blautia_sp__SG_772	2.23356e-05	2.04984e-05
Leclercia_adecarboxylata	2.23356e-05	2.04984e-05
Salmonella_sp__gx_f5	2.23356e-05	2.04984e-05
Actinomyces_oris	2.14927e-05	2.04984e-05
Oribacterium_sinus	1.9807e-05	2.04984e-05
Hirsutella_rhossiliensis	1.89642e-05	2.04984e-05
Schaalia_odontolytica	1.89642e-05	2.04984e-05
Staphylococcus_epidermidis	1.81213e-05	2.04984e-05
Coprococcus_sp__AF16_22	1.81213e-05	2.04984e-05
Coprococcus_sp__AF19_8AC	1.72785e-05	2.04984e-05
Rothia_mucilaginosa	1.6857e-05	2.04984e-05
Clostridium_sp__BIOML_A1	1.6857e-05	2.04984e-05
Blautia_schinkii	1.6857e-05	2.04984e-05
Bacteroides_clarus	1.55928e-05	2.04984e-05
Blautia_stercoris	1.55928e-05	2.04984e-05
Mycobacterium_branderi	1.34856e-05	2.04984e-05
Enterobacter_hormaechei	1.22214e-05	2.04984e-05
Ruminococcus_sp__NSJ_13	1.22214e-05	2.04984e-05
Mediterraneibacter_sp__210702_DFI_5_30	4.29854e-05	1.93596e-05
Anaerotruncus_sp__1XD22_93	3.62426e-05	1.93596e-05
Virgibacillus_indicus	2.90784e-05	1.93596e-05
Prevotella_corporis	2.78141e-05	1.93596e-05
Butyricimonas_faecalis	2.48641e-05	1.93596e-05
Acidaminococcus_intestini	2.31784e-05	1.93596e-05
Agathobacter_ruminis	1.9807e-05	1.93596e-05
Roseburia_sp__AF15_21	1.85427e-05	1.93596e-05
Klebsiella_michiganensis	1.76999e-05	1.93596e-05
Coprococcus_sp__ART55_1	1.72785e-05	1.93596e-05
Streptomyces_sp__DH5	1.55928e-05	1.93596e-05
Clostridium_sp__TF08_15	1.51713e-05	1.93596e-05
Clostridium_butyricum	1.43285e-05	1.93596e-05
Klebsiella_variicola	1.39071e-05	1.93596e-05
Bacteroides_sp__1001136B_160425_E2	1.34856e-05	1.93596e-05
Ruminococcus_sp__AF41_9	1.26428e-05	1.93596e-05
Bifidobacterium_angulatum	1.17999e-05	1.93596e-05
Mycobacterium_tuberculosis	1.17999e-05	1.93596e-05
Roseburia_sp__TF10_5	1.13785e-05	1.93596e-05
Bacteroides_caccae	1.09571e-05	1.93596e-05
Roseburia_intestinalis	1.01142e-05	1.93596e-05
Prevotella_ihumii	0.000121792	1.82208e-05
Alloprevotella_sp__oral_taxon_473	5.68925e-05	1.82208e-05
Halanaerobium_saccharolyticum	5.26782e-05	1.82208e-05
Clostridium_sp__AF20_7	4.59354e-05	1.82208e-05
Clostridium_polysaccharolyticum	3.87712e-05	1.82208e-05
Lactococcus_cremoris	3.45569e-05	1.82208e-05
Blautia_sp__AF19_13LB	3.37141e-05	1.82208e-05
Clostridium_sp__C5S11	2.99212e-05	1.82208e-05
Prevotella_oris	2.99212e-05	1.82208e-05
Collinsella_sp__AF38_3AC	2.90784e-05	1.82208e-05
Rhizobium_leguminosarum	2.73927e-05	1.82208e-05
Escherichia_marmotae	2.61284e-05	1.82208e-05
Eisenbergiella_sp__OF01_20	2.5707e-05	1.82208e-05
Klebsiella_africana	2.19142e-05	1.82208e-05
Klebsiella_oxytoca	1.89642e-05	1.82208e-05
Veillonella_tobetsuensis	1.85427e-05	1.82208e-05
Clostridium_sp__AF15_31	1.85427e-05	1.82208e-05
Bacteroides_sp__M27	1.76999e-05	1.82208e-05
Neisseria_gonorrhoeae	1.76999e-05	1.82208e-05
Vibrio_vulnificus	1.72785e-05	1.82208e-05
Ruminococcus_sp__1001713B170207_170306_F5	1.6857e-05	1.82208e-05
Prevotella_amnii	1.64356e-05	1.82208e-05
Levilactobacillus_brevis	1.51713e-05	1.82208e-05
Megamonas_hypermegale	1.51713e-05	1.82208e-05
Clostridium_sp__AF34_13	1.43285e-05	1.82208e-05
Eubacterium_sp__AF22_8LB	1.39071e-05	1.82208e-05
Clostridium_perfringens	1.39071e-05	1.82208e-05
Enterobacter_roggenkampii	1.17999e-05	1.82208e-05
Subdoligranulum_sp__APC924_74	1.05356e-05	1.82208e-05
Bifidobacterium_longum	9.27137e-06	1.82208e-05
Klebsiella_quasipneumoniae	8.00709e-06	1.82208e-05
Clostridium_sp__chh4_2	4.29854e-05	1.7082e-05
Blautia_sp__SC05B48	3.66641e-05	1.7082e-05
Veillonella_sp__T34266_5	2.65498e-05	1.7082e-05
Bacteroides_sp__An322	2.44427e-05	1.7082e-05
Faecalibacterium_sp__Marseille_P9590	2.40213e-05	1.7082e-05
Azoarcus_indigens	2.40213e-05	1.7082e-05
Streptococcus_sp__F0442	2.35999e-05	1.7082e-05
Clostridium_sp__AM34_11AC	2.2757e-05	1.7082e-05
Hungatella_xylanolytica	2.19142e-05	1.7082e-05
Butyrivibrio_sp__NC3005	2.14927e-05	1.7082e-05
Ruminococcus_sp__AF21_42	2.06499e-05	1.7082e-05
Leptospira_interrogans	1.89642e-05	1.7082e-05
Bacteroides_sp__L10_4	1.89642e-05	1.7082e-05
Megasphaera_sp__AM44_1BH	1.89642e-05	1.7082e-05
Faecalibacterium_sp__Marseille_P9312	1.85427e-05	1.7082e-05
Bacteroides_sp__3_1_13	1.76999e-05	1.7082e-05
Anaerobutyricum_soehngenii	1.76999e-05	1.7082e-05
Prevotella_sp__AGR2160	1.6857e-05	1.7082e-05
Bacteroides_oleiciplenus	1.64356e-05	1.7082e-05
Campylobacter_coli	1.64356e-05	1.7082e-05
Faecalibacterium_sp__OF04_11AC	1.64356e-05	1.7082e-05
Lactobacillus_johnsonii	1.64356e-05	1.7082e-05
Shigella_flexneri	1.60142e-05	1.7082e-05
Stenotrophomonas_maltophilia	1.60142e-05	1.7082e-05
Kluyvera_georgiana	1.55928e-05	1.7082e-05
Enterobacter_bugandensis	1.51713e-05	1.7082e-05
Bacteroides_sp__KFT8	1.51713e-05	1.7082e-05
Bacteroides_salyersiae	1.39071e-05	1.7082e-05
Lacrimispora_saccharolytica	1.39071e-05	1.7082e-05
Bacteroides_sp__D55t1_190419_B8	1.26428e-05	1.7082e-05
Clostridium_sp__AF34_10BH	1.26428e-05	1.7082e-05
Ruminococcus_sp__NSJ_71	1.17999e-05	1.7082e-05
Phascolarctobacterium_sp__Marseille_Q4147	1.05356e-05	1.7082e-05
Ruminococcus_sp__CLA_AA_H200	0.000140756	1.59432e-05
Blautia_sp__MSJ_19	3.58212e-05	1.59432e-05
Collinsella_sp__AK_207A	3.53998e-05	1.59432e-05
Clostridium_baratii	2.73927e-05	1.59432e-05
Murimonas_intestini	2.69713e-05	1.59432e-05
Prevotella_scopos	2.65498e-05	1.59432e-05
Faecalicatena_faecalis	2.61284e-05	1.59432e-05
Slackia_isoflavoniconvertens	2.14927e-05	1.59432e-05
Tetrahymena_thermophila	1.9807e-05	1.59432e-05
Proteus_mirabilis	1.89642e-05	1.59432e-05
Campylobacter_fetus	1.89642e-05	1.59432e-05
Bacteroides_sp__D22	1.76999e-05	1.59432e-05
Escherichia_albertii	1.64356e-05	1.59432e-05
Enterococcus_faecalis	1.60142e-05	1.59432e-05
Bifidobacterium_ruminantium	1.60142e-05	1.59432e-05
Enterococcus_faecium	1.55928e-05	1.59432e-05
Barnesiella_intestinihominis	1.55928e-05	1.59432e-05
Streptococcus_oralis	1.39071e-05	1.59432e-05
Lacticaseibacillus_rhamnosus	1.22214e-05	1.59432e-05
Comamonas_kerstersii	1.17999e-05	1.59432e-05
Salmonella_enterica	1.13785e-05	1.59432e-05
Gemmiger_formicilis	1.09571e-05	1.59432e-05
Sarcina_ventriculi	9.6928e-06	1.59432e-05
Phocaeicola_vulgatus	7.16424e-06	1.59432e-05
Paraprevotella_xylaniphila	0.000999622	1.48044e-05
Butyrivibrio_sp__MC2013	3.66641e-05	1.48044e-05
Ruminococcus_sp__1001262B_160229_C12	2.73927e-05	1.48044e-05
Bifidobacterium_pseudolongum	2.35999e-05	1.48044e-05
Bacillus_anthracis	2.35999e-05	1.48044e-05
Ruminococcus_sp__MCC718	2.31784e-05	1.48044e-05
Weissella_cibaria	2.2757e-05	1.48044e-05
Bacillus_paralicheniformis	2.23356e-05	1.48044e-05
Ruminococcus_sp__AF12_5	2.19142e-05	1.48044e-05
Staphylococcus_haemolyticus	2.14927e-05	1.48044e-05
Coprobacillus_sp__K06	2.02284e-05	1.48044e-05
Parabacteroides_pacaensis	1.85427e-05	1.48044e-05
Streptococcus_agalactiae	1.81213e-05	1.48044e-05
Bacillus_pumilus	1.81213e-05	1.48044e-05
Shigella_sonnei	1.72785e-05	1.48044e-05
Actinomadura_cremea	1.55928e-05	1.48044e-05
Fusobacterium_pseudoperiodonticum	1.47499e-05	1.48044e-05
Anaerostipes_hadrus	1.39071e-05	1.48044e-05
Megasphaera_micronuciformis	1.39071e-05	1.48044e-05
Klebsiella_aerogenes	1.30642e-05	1.48044e-05
Roseburia_sp__BX0805	1.17999e-05	1.48044e-05
Coprococcus_sp__OM04_5BH	9.27137e-06	1.48044e-05
Bacteroides_sp__GM023	7.58567e-06	1.48044e-05
Bacteroides_eggerthii	6.32139e-06	1.48044e-05
Bacteroides_nordii	0.0028185	1.36656e-05
Traorella_massiliensis	5.05711e-05	1.36656e-05
Enterobacter_lignolyticus	4.93068e-05	1.36656e-05
Butyrivibrio_sp__VCB2006	4.63569e-05	1.36656e-05
Streptococcus_equi	3.70855e-05	1.36656e-05
Actinomyces_sp__ICM47	2.61284e-05	1.36656e-05
Eubacterium_ruminantium	2.61284e-05	1.36656e-05
Mesosutterella_multiformis	2.5707e-05	1.36656e-05
Faecalicatena_contorta	2.44427e-05	1.36656e-05
Solobacterium_moorei	2.10713e-05	1.36656e-05
Butyricicoccus_sp__AM42_5AC	2.06499e-05	1.36656e-05
Enterobacter_kobei	1.93856e-05	1.36656e-05
Borreliella_garinii	1.89642e-05	1.36656e-05
Salmonella_sp__gx_f7	1.81213e-05	1.36656e-05
Staphylococcus_pseudintermedius	1.51713e-05	1.36656e-05
Erysipelatoclostridium_ramosum	1.47499e-05	1.36656e-05
Salinicoccus_roseus	1.43285e-05	1.36656e-05
Fusicatenibacter_saccharivorans	1.39071e-05	1.36656e-05
Roseburia_porci	1.34856e-05	1.36656e-05
Vibrio_parahaemolyticus	1.30642e-05	1.36656e-05
Bifidobacterium_pseudocatenulatum	7.58567e-06	1.36656e-05
Terrisporobacter_othiniensis	3.70855e-05	1.25268e-05
Lachnoclostridium_sp__Marseille_P6806	3.11855e-05	1.25268e-05
Prevotella_falsenii	3.11855e-05	1.25268e-05
Bacteroides_ndongoniae	2.69713e-05	1.25268e-05
Rickettsiella_massiliensis	2.31784e-05	1.25268e-05
Streptococcus_equinus	2.31784e-05	1.25268e-05
Novacetimonas_hansenii	2.10713e-05	1.25268e-05
Hallella_seregens	1.85427e-05	1.25268e-05
Bacteroides_sp__AM23_18	1.85427e-05	1.25268e-05
Megamonas_sp__Calf98_2	1.76999e-05	1.25268e-05
Gemella_haemolysans	1.60142e-05	1.25268e-05
Burkholderia_multivorans	1.47499e-05	1.25268e-05
Streptococcus_sanguinis	1.47499e-05	1.25268e-05
Mediterraneibacter_faecis	1.26428e-05	1.25268e-05
Waltera_sp__CLA_AA_H273	1.22214e-05	1.25268e-05
Bacteroides_cellulosilyticus	1.13785e-05	1.25268e-05
Bifidobacterium_sp__N5G01	9.6928e-06	1.25268e-05
Lactococcus_taiwanensis	2.65498e-05	1.1388e-05
Streptococcus_suis	2.5707e-05	1.1388e-05
Butyricicoccus_sp__OF10_2	2.40213e-05	1.1388e-05
Blautia_sp__OM07_19	2.06499e-05	1.1388e-05
Bacteroides_zoogleoformans	2.06499e-05	1.1388e-05
Blautia_sp__DFI_6_71	1.85427e-05	1.1388e-05
Bifidobacterium_animalis	1.85427e-05	1.1388e-05
Bilophila_wadsworthia	1.72785e-05	1.1388e-05
Bacteroides_gallinarum	1.72785e-05	1.1388e-05
Bacteroides_sp__OF04_15BH	1.64356e-05	1.1388e-05
Candidatus_Campylobacter_infans	1.55928e-05	1.1388e-05
Anaerobutyricum_hallii	1.34856e-05	1.1388e-05
Anaerostipes_sp__MSJ_23	1.30642e-05	1.1388e-05
Bifidobacterium_bifidum	1.17999e-05	1.1388e-05
Staphylococcus_aureus	1.17999e-05	1.1388e-05
Bifidobacterium_sp__N4G05	1.17999e-05	1.1388e-05
Hallella_sp__CLA_AA_H145	1.01142e-05	1.1388e-05
Prevotella_mizrahii	9.6928e-06	1.1388e-05
Bacteroides_xylanisolvens	8.00709e-06	1.1388e-05
Enterocloster_aldenensis	0.000381812	1.02492e-05
Anaerosacchariphilus_polymeriproducens	4.63569e-05	1.02492e-05
Lelliottia_amnigena	3.20284e-05	1.02492e-05
Variimorphobacter_saccharofermentans	2.94998e-05	1.02492e-05
Paratractidigestivibacter_faecalis	2.35999e-05	1.02492e-05
Anaerotignum_faecicola	2.31784e-05	1.02492e-05
Butyrivibrio_sp__NC2002	2.2757e-05	1.02492e-05
Roseburia_sp__AF34_16	2.02284e-05	1.02492e-05
Streptococcus_australis	1.85427e-05	1.02492e-05
Ellagibacter_isourolithinifaciens	1.76999e-05	1.02492e-05
Desulfovibrio_piger	1.72785e-05	1.02492e-05
Lactiplantibacillus_mudanjiangensis	1.6857e-05	1.02492e-05
Victivallis_sp__Marseille_Q1083	1.51713e-05	1.02492e-05
Clostridium_innocuum	1.47499e-05	1.02492e-05
Faecalicatena_fissicatena	1.43285e-05	1.02492e-05
Sutterella_wadsworthensis	1.09571e-05	1.02492e-05
Pseudomonas_viridiflava	1.09571e-05	1.02492e-05
Streptococcus_thermophilus	1.05356e-05	1.02492e-05
Prevotella_sp__885	8.42852e-06	1.02492e-05
Clostridium_symbiosum	4.17212e-05	9.11039e-06
Butyrivibrio_sp__AC2005	2.65498e-05	9.11039e-06
Bacteroides_sp__224	2.48641e-05	9.11039e-06
Lachnoclostridium_sp__An131	2.44427e-05	9.11039e-06
Citrobacter_amalonaticus	2.35999e-05	9.11039e-06
Bifidobacterium_pullorum	2.02284e-05	9.11039e-06
Bacteroides_sp__NSJ_39	1.85427e-05	9.11039e-06
Pectobacterium_brasiliense	1.81213e-05	9.11039e-06
Bacteroides_sp__OF03_11BH	1.6857e-05	9.11039e-06
Bacteroides_sp__2_2_4	1.51713e-05	9.11039e-06
Megasphaera_elsdenii	1.51713e-05	9.11039e-06
Roseburia_hominis	1.05356e-05	9.11039e-06
Bacillus_thuringiensis	8.42852e-06	9.11039e-06
Haemophilus_haemolyticus	0.000381391	7.97159e-06
Ruminococcus_sp__AF17_11	2.8657e-05	7.97159e-06
Citrobacter_braakii	2.2757e-05	7.97159e-06
Clostridium_sp__AM30_24	2.19142e-05	7.97159e-06
Lactobacillus_paragasseri	1.93856e-05	7.97159e-06
Roseburia_sp__AF12_17LB	1.89642e-05	7.97159e-06
Pantoea_ananatis	1.85427e-05	7.97159e-06
Klebsiella_sp__Kps	1.76999e-05	7.97159e-06
Campylobacter_concisus	1.55928e-05	7.97159e-06
Clostridium_sp__AF15_41	1.55928e-05	7.97159e-06
Bacteroides_faecichinchillae	1.39071e-05	7.97159e-06
Coprococcus_comes	1.01142e-05	7.97159e-06
Blautia_sp__M16	8.68137e-05	6.83279e-06
Collinsella_bouchesdurhonensis	2.73927e-05	6.83279e-06
Morganella_morganii	2.19142e-05	6.83279e-06
Megasphaera_sp__BL7	1.85427e-05	6.83279e-06
Bacteroides_helcogenes	1.72785e-05	6.83279e-06
Holdemanella_biformis	1.30642e-05	6.83279e-06
Bacteroides_sp__D2	1.26428e-05	6.83279e-06
Lactobacillus_delbrueckii	1.01142e-05	6.83279e-06
Eubacterium_oxidoreducens	2.69713e-05	5.694e-06
Suipraeoptans_intestinalis	8.30209e-05	4.5552e-06
Enterobacter_asburiae	1.51713e-05	4.5552e-06
Acidithiobacillus_ferriphilus	1.22214e-05	4.5552e-06
Acinetobacter_venetianus	1.17999e-05	4.5552e-06
Eubacterium_ventriosum	1.55928e-05	2.2776e-06
Streptococcus_mitis	1.22214e-05	2.2776e-06
Faecalibacterium_prausnitzii	1.17999e-05	2.2776e-06

## Sheet: Genus
Genus	PRE	POST
Prevotella	0.62455	0.510404
Bacteroides	0.023001	0.106121
Roseburia	0.0148578	0.0311165
Escherichia	0.0235859	0.026813
Klebsiella	0.0156556	0.0212785
Phocaeicola	0.0847711	0.0201852
Faecalibacterium	0.0180434	0.0195418
Pseudonocardia	0.00280501	0.0172779
Prevotellamassilia	0.0169299	0.0172596
Bifidobacterium	0.00377556	0.0166504
Veillonella	0.00497704	0.0162165
Mitsuokella	0.0110978	0.0100032
Clostridium	0.00877872	0.00972307
Ruminococcus	0.00869275	0.00906826
Ligilactobacillus	0.00218172	0.00885986
Coprococcus	0.00669224	0.00871067
Lachnospira	0.00694679	0.00860249
Megamonas	0.00439463	0.00740903
Streptococcus	0.00715076	0.00688632
Acinetobacter	0.00292427	0.00573044
Blautia	0.00406887	0.00544004
Bacillus	0.00279869	0.0054389
Dorea	0.00336509	0.0054036
Waltera	0.00241098	0.0053683
Mediterraneibacter	0.00154368	0.00417598
Holdemanella	0.00361246	0.00395847
Butyrivibrio	0.00114459	0.00388786
Enterobacter	0.00290615	0.00386281
Brachyspira	1.26428e-05	0.00357469
Gemmiger	0.00259472	0.00338451
Oscillibacter	0.00599731	0.00309867
Megasphaera	0.00221164	0.00258849
Hallella	0.00127229	0.00256571
Pseudomonas	0.00120233	0.00239034
Catenibacterium	0.00129883	0.00224343
Dialister	0.00573814	0.0022218
Subdoligranulum	0.00120696	0.00217738
Lactobacillus	0.000484218	0.00196784
Haemophilus	0.00324498	0.00194279
Campylobacter	0.00169793	0.00192002
Eubacterium	0.0015774	0.00190066
Parabacteroides	0.0039357	0.00179816
Lachnoclostridium	0.00209069	0.00175944
Phascolarctobacterium	6.86924e-05	0.0017492
Sarcina	0.000234734	0.0016729
Romboutsia	0.000244427	0.00165581
Sutterella	0.00129209	0.00158749
Salmonella	0.000871509	0.00151802
Collinsella	0.00176493	0.00149069
Not_Assigned	0.000696617	0.00144286
Succinivibrio	0.00243711	0.00144172
Vescimonas	0.00243542	0.00130392
Alistipes	0.00283704	0.00126179
Staphylococcus	0.000547854	0.00110577
Mycobacterium	0.000380126	0.00104314
Butyricicoccus	0.00106241	0.000868904
Fusicatenibacter	0.000586625	0.000835879
Dysosmobacter	0.00128788	0.000784633
Acidaminococcus	0.000420162	0.000776661
Flavonifractor	0.00241604	0.000766412
Selenomonas	0.00265246	0.000747052
Limosilactobacillus	0.00077416	0.000743636
Lacticaseibacillus	0.000371698	0.00069239
Anaerostipes	0.000282355	0.000674169
Anaerobutyricum	0.000414262	0.000659365
Duodenibacillus	0.00105525	0.000634311
Vibrio	0.000419319	0.00060698
Lacrimispora	0.000444604	0.000604702
Kineothrix	0.000836531	0.000603564
Bradyrhizobium	2.40213e-05	0.000585343
Paraprevotella	0.00178432	0.000546624
Shigella	0.000385605	0.000509043
Akkermansia	0.00128661	0.000507904
Enterococcus	0.000250748	0.000468046
Agathobaculum	0.000515825	0.00044527
Intestinimonas	0.00071516	0.000440715
Comamonas	2.23356e-05	0.000417939
Odoribacter	0.000585782	0.000381498
Pseudoflavonifractor	0.000955373	0.000362138
Faecalicatena	0.000189642	0.000356444
Enterocloster	0.000655317	0.000355305
Erysipelatoclostridium	9.52423e-05	0.000353028
Clostridioides	0.000256227	0.000337085
Citrobacter	0.000717688	0.000334807
Methanobrevibacter	0.000500654	0.000332529
Desulfovibrio	0.00028067	0.000332529
Acidithiobacillus	4.2564e-05	0.000329113
Gemella	0.000101142	0.000290394
Ruthenibacterium	0.000565554	0.000285839
Anaerotignum	0.000344305	0.000276728
Pseudobutyrivibrio	0.000185427	0.000274451
Bilophila	0.000182899	0.000261924
Barnesiella	0.000144971	0.000248258
Serratia	0.000222513	0.000247119
Burkholderia	0.000105356	0.000240287
Weissella	0.000296262	0.000238009
Streptomyces	9.48208e-05	0.000228899
Nostoc	0.000349362	0.000226621
Victivallis	0.000447133	0.000220927
Fusobacterium	7.4171e-05	0.000216372
Butyricimonas	0.000252013	0.000207261
Luteimonas	0.000152135	0.000206123
Colidextribacter	0.000263813	0.000195873
Actinomyces	5.68925e-05	0.000186763
Flintibacter	0.000238949	0.000185624
Listeria	6.57425e-05	0.000181069
Cronobacter	0.000264234	0.00017993
Kluyvera	3.28712e-05	0.000175375
Rothia	0.000104514	0.000173097
Alloprevotella	0.000163513	0.000168542
Marseilla	0.000179106	0.000165126
Actinomadura	7.24853e-05	0.000158293
Toxoplasma	5.4364e-05	0.000149183
Salinicoccus	5.89996e-06	0.000145766
Slackia	0.000118842	0.00014235
Eisenbergiella	0.000198492	0.000137795
Falcatimonas	6.95353e-05	0.000136656
Lactiplantibacillus	5.81568e-05	0.000136656
Hungatella	0.000147078	0.000133239
Tetrahymena	0.000103249	0.000133239
Plasmodium	7.92281e-05	0.000128684
Allisonella	0.000229677	0.000124129
Oribacterium	0.000180792	0.000124129
Stenotrophomonas	4.88854e-05	0.000124129
Intestinibacter	7.1221e-05	0.000120713
Olsenella	0.000101985	0.000119574
Anaerotruncus	0.000215349	0.000118435
Neisseria	5.01497e-05	0.000116158
Levilactobacillus	5.05711e-06	0.000112741
Senegalimassilia	0.000129378	0.000111602
Ellagibacter	5.81568e-05	0.000103631
Nocardia	4.80426e-05	0.000102492
Rhizophagus	8.42852e-05	9.67979e-05
Lachnobacterium	5.98425e-05	9.22427e-05
Lachnoanaerobaculum	6.32139e-05	8.99651e-05
Helicobacter	9.77708e-05	8.76875e-05
Acetivibrio	8.55495e-05	8.76875e-05
Parolsenella	8.04924e-05	8.42711e-05
Paenibacillus	4.71997e-05	8.42711e-05
Hirsutella	4.71997e-05	8.19935e-05
Agathobacter	5.05711e-05	8.08547e-05
Coprobacillus	5.56282e-05	7.85771e-05
Moraxella	6.19496e-05	7.74383e-05
Anaerobiospirillum	8.93423e-05	7.40219e-05
Mediterranea	7.66995e-05	7.28831e-05
Pectobacterium	3.20284e-05	7.28831e-05
Aeromonas	3.45569e-05	6.94667e-05
Paeniclostridium	5.26782e-05	6.83279e-05
Pantoea	3.16069e-05	6.71891e-05
Botrytis	5.39425e-05	6.60503e-05
Desulfotomaculum	7.16424e-05	6.49115e-05
Sodaliphilus	7.37495e-05	6.37728e-05
Virgibacillus	2.82355e-05	6.37728e-05
Tyzzerella	4.97283e-05	6.14952e-05
Faecalimonas	2.69713e-05	5.58012e-05
Parafannyhessea	7.7121e-05	5.46624e-05
Turicibacter	2.35999e-05	5.46624e-05
Pararoseburia	5.01497e-05	5.35236e-05
Borreliella	1.93856e-05	5.35236e-05
Proteus	1.93856e-05	5.35236e-05
Blastocystis	9.18709e-05	5.23848e-05
Saccharomyces	7.03781e-05	5.23848e-05
Aliarcobacter	5.30997e-05	5.23848e-05
Raoultella	4.04569e-05	5.23848e-05
Lactococcus	3.49784e-05	5.23848e-05
Anaerofilum	6.27925e-05	5.1246e-05
Mycobacteroides	3.03427e-05	5.01072e-05
Morganella	2.8657e-05	5.01072e-05
Leptospira	1.55928e-05	5.01072e-05
Dictyostelium	2.8657e-05	4.78296e-05
Hydrogenoanaerobacterium	6.57425e-05	4.66908e-05
Trichomonas	4.08783e-05	4.66908e-05
Phycomyces	3.9614e-05	4.66908e-05
Paundivirus	2.23356e-05	4.66908e-05
Solobacterium	2.19142e-05	4.66908e-05
Intestinibacillus	8.38638e-05	4.5552e-05
Lachnotalea	5.98425e-05	4.5552e-05
Anaeromassilibacillus	4.8464e-05	4.5552e-05
Schaedlerella	3.16069e-05	4.5552e-05
Paratractidigestivibacter	2.82355e-05	4.5552e-05
Pasteurella	2.5707e-05	4.5552e-05
Velocimicrobium	2.48641e-05	4.44132e-05
Pluralibacter	3.66641e-05	4.32744e-05
Azoarcus	2.40213e-05	4.32744e-05
Salifodinibacter	2.06499e-05	4.32744e-05
Aequorivita	1.64356e-05	4.32744e-05
Schaalia	8.42852e-06	4.32744e-05
Parasutterella	9.81923e-05	4.21356e-05
Priestia	3.66641e-05	4.21356e-05
Holdemania	3.70855e-05	4.09968e-05
Sellimonas	2.99212e-05	4.09968e-05
Novacetimonas	1.64356e-05	4.09968e-05
Gilliamella	3.07641e-05	3.9858e-05
Catonella	2.90784e-05	3.9858e-05
Glaesserella	2.35999e-05	3.9858e-05
Candida	2.2757e-05	3.9858e-05
Phocea	7.4171e-05	3.87192e-05
Chromatium	2.90784e-05	3.87192e-05
Herbaspirillum	1.09571e-05	3.87192e-05
Sporofaciens	4.00355e-05	3.75804e-05
Terrisporobacter	3.32927e-05	3.75804e-05
Oliverpabstia	3.24498e-05	3.75804e-05
Cavenderia	2.31784e-05	3.75804e-05
Ichthyophthirius	2.14927e-05	3.75804e-05
Parvimonas	1.76999e-05	3.75804e-05
Lawsonibacter	6.70067e-05	3.64416e-05
Paraclostridium	4.97283e-05	3.64416e-05
Candidatus_Galacturonibacter	1.39071e-05	3.64416e-05
Hespellia	2.52856e-05	3.53028e-05
Modestobacter	1.60142e-05	3.53028e-05
Rhizobium	2.31784e-05	3.4164e-05
Mesosutterella	2.06499e-05	3.4164e-05
Leclercia	1.39071e-05	3.4164e-05
Legionella	1.34856e-05	3.4164e-05
Thermococcus	1.30642e-05	3.4164e-05
Bariatricus	4.42497e-05	3.30252e-05
Porphyromonas	3.66641e-05	3.18864e-05
Dechloromonas	2.52856e-05	3.18864e-05
Murimonas	2.02284e-05	3.18864e-05
Acytostelium	1.55928e-05	3.18864e-05
Acetatifactor	3.58212e-05	3.07476e-05
Bittarella	3.20284e-05	3.07476e-05
Blattabacterium	2.8657e-05	3.07476e-05
Prochlorococcus	2.78141e-05	3.07476e-05
Trypanosoma	2.40213e-05	3.07476e-05
Pseudoruminococcus	0.000107885	2.96088e-05
Marvinbryantia	3.70855e-05	2.96088e-05
Eggerthella	3.32927e-05	2.96088e-05
Frankia	2.10713e-06	2.96088e-05
Pseudoprevotella	4.2564e-05	2.847e-05
Variimorphobacter	2.02284e-05	2.847e-05
Lelliottia	2.10713e-05	2.73312e-05
Leptomonas	1.85427e-05	2.73312e-05
Rickettsiella	9.27137e-06	2.73312e-05
Buchnera	3.37141e-05	2.61924e-05
Carnobacterium	1.72785e-05	2.61924e-05
Pusillibacter	4.63569e-05	2.50536e-05
Mammaliicoccus	3.58212e-05	2.50536e-05
Candidatus_Minimicrobia	1.76999e-05	2.50536e-05
Hyaloscypha	1.30642e-05	2.50536e-05
Riemerella	1.17999e-05	2.50536e-05
Acutalibacter	6.02639e-05	2.39148e-05
Franconibacter	2.8657e-05	2.39148e-05
Frisingicoccus	1.6857e-05	2.39148e-05
Melampsora	1.55928e-05	2.39148e-05
Naegleria	1.51713e-05	2.39148e-05
Pedobacter	1.43285e-05	2.39148e-05
Sporobacter	5.05711e-05	2.2776e-05
Bilifractor	2.2757e-05	2.2776e-05
Merdimonas	1.6857e-05	2.2776e-05
Alcaligenes	1.39071e-05	2.2776e-05
Capnocytophaga	1.34856e-05	2.2776e-05
Eimeria	1.05356e-05	2.2776e-05
Hydrogeniiclostidium	2.82355e-05	2.16372e-05
Metaprevotella	2.40213e-05	2.16372e-05
Sanguibacteroides	2.31784e-05	2.16372e-05
Anaerobium	2.14927e-05	2.16372e-05
Luxibacter	1.55928e-05	2.16372e-05
Coprobacter	1.47499e-05	2.16372e-05
Muribaculum	4.38283e-05	2.04984e-05
Angelakisella	3.9614e-05	2.04984e-05
Ructibacterium	3.79283e-05	2.04984e-05
Paramuribaculum	3.03427e-05	2.04984e-05
Massiliimalia	2.40213e-05	2.04984e-05
Anaerofustis	2.2757e-05	2.04984e-05
Acetitomaculum	1.6857e-05	2.04984e-05
Mordavella	2.78141e-05	1.93596e-05
Elizabethkingia	1.85427e-05	1.93596e-05
Cytobacillus	1.17999e-05	1.93596e-05
Paecilomyces	1.13785e-05	1.93596e-05
Sclerotinia	1.01142e-05	1.93596e-05
Mogibacterium	2.90784e-05	1.82208e-05
Heminiphilus	2.19142e-05	1.82208e-05
Anaerosacchariphilus	1.76999e-05	1.82208e-05
Lactonifactor	1.72785e-05	1.82208e-05
Anaerosporobacter	1.43285e-05	1.82208e-05
Candidatus_Nanosynbacter	1.17999e-05	1.82208e-05
Macrococcus	8.00709e-06	1.82208e-05
Neobittarella	3.66641e-05	1.7082e-05
Ethanoligenens	1.89642e-05	1.7082e-05
Finegoldia	1.89642e-05	1.7082e-05
Atlantibacter	1.64356e-05	1.7082e-05
Inconstantimicrobium	1.60142e-05	1.7082e-05
Pseudoalteromonas	2.65498e-05	1.59432e-05
Heterostelium	1.89642e-05	1.59432e-05
Aliivibrio	1.39071e-05	1.59432e-05
Achromobacter	7.16424e-06	1.59432e-05
Arcanobacterium	1.81213e-05	1.48044e-05
Peptostreptococcus	1.81213e-05	1.48044e-05
Duncaniella	1.72785e-05	1.48044e-05
Anaerocolumna	1.47499e-05	1.48044e-05
Treponema	0.0028185	1.36656e-05
Evtepia	4.93068e-05	1.36656e-05
Kluyveromyces	4.63569e-05	1.36656e-05
Candidatus_Pelagibacter	2.06499e-05	1.36656e-05
Halanaerobium	1.43285e-05	1.36656e-05
Acanthamoeba	1.85427e-05	1.25268e-05
Tannerella	1.85427e-05	1.25268e-05
Fournierella	1.60142e-05	1.25268e-05
Massilistercora	1.47499e-05	1.25268e-05
Xanthomonas	1.26428e-05	1.25268e-05
Tamlana	9.6928e-06	1.25268e-05
Flavobacterium	2.40213e-05	1.1388e-05
Acetanaerobacterium	2.06499e-05	1.1388e-05
Tenuifilum	1.85427e-05	1.1388e-05
Stomatobaculum	1.72785e-05	1.1388e-05
Colwellia	1.17999e-05	1.1388e-05
Negativibacillus	1.17999e-05	1.1388e-05
Traorella	1.17999e-05	1.1388e-05
Candidatus_Borkfalkia	4.63569e-05	1.02492e-05
Papillibacter	2.94998e-05	1.02492e-05
Suipraeoptans	1.72785e-05	1.02492e-05
Senegalia	1.6857e-05	1.02492e-05
Caproiciproducens	1.09571e-05	1.02492e-05
Thermoclostridium	1.09571e-05	1.02492e-05
Gordonibacter	1.05356e-05	1.02492e-05
Succinatimonas	2.35999e-05	9.11039e-06
Rossellomorea	1.6857e-05	9.11039e-06
Anaerobacterium	1.51713e-05	9.11039e-06
Candidatus_Soleaferrea	1.76999e-05	7.97159e-06
Emergencia	1.55928e-05	7.97159e-06
Sinorhizobium	1.30642e-05	6.83279e-06
Vagococcus	1.51713e-05	4.5552e-06
Massilioclostridium	1.22214e-05	4.5552e-06
Mycolicibacterium	1.55928e-05	2.2776e-06
Mageeibacillus	1.22214e-05	2.2776e-06

## Sheet: Family
Family	PRE	POST
Prevotellaceae	0.644946	0.53116
Bacteroidaceae	0.107849	0.126379
Lachnospiraceae	0.0483759	0.0805245
Enterobacteriaceae	0.0445768	0.0548696
Oscillospiraceae	0.0432665	0.0385381
Veillonellaceae	0.0131565	0.0211509
Selenomonadaceae	0.0181449	0.0181593
Pseudonocardiaceae	0.00280501	0.0172779
Bifidobacteriaceae	0.00377556	0.0166504
Lactobacillaceae	0.00417127	0.0127511
Clostridiaceae	0.0104324	0.0126407
Streptococcaceae	0.00718573	0.0069387
Moraxellaceae	0.00298622	0.00580788
Not_Assigned	0.0043449	0.00579079
Bacillaceae	0.00289225	0.00557328
Erysipelotrichaceae	0.00377851	0.00441057
Brachyspiraceae	1.26428e-05	0.00357469
Acidaminococcaceae	0.000488854	0.00252586
Pseudomonadaceae	0.00120233	0.00239034
Coprobacillaceae	0.00135446	0.00232201
Sutterellaceae	0.00246618	0.0022981
Peptostreptococcaceae	0.000675967	0.00223432
Pasteurellaceae	0.00329429	0.0020282
Eubacteriaceae	0.00168402	0.00196671
Campylobacteraceae	0.00169793	0.00192002
Tannerellaceae	0.00395424	0.00181069
Coriobacteriaceae	0.00189431	0.00160229
Succinivibrionaceae	0.00255005	0.00152485
Staphylococcaceae	0.000597582	0.00129481
Rikenellaceae	0.00283704	0.00126179
Mycobacteriaceae	0.000426062	0.00109552
Vibrionaceae	0.000433226	0.000622923
Desulfovibrionaceae	0.000463569	0.000594453
Odoribacteraceae	0.000837795	0.000588759
Nitrobacteraceae	2.40213e-05	0.000585343
Akkermansiaceae	0.00128661	0.000507904
Enterococcaceae	0.00026592	0.000472602
Comamonadaceae	2.23356e-05	0.000417939
Xanthomonadaceae	0.000213663	0.000342779
Methanobacteriaceae	0.000500654	0.000332529
Acidithiobacillaceae	4.2564e-05	0.000329113
Atopobiaceae	0.000287834	0.000304059
Eggerthellaceae	0.000220827	0.000285839
Barnesiellaceae	0.00015972	0.000269895
Yersiniaceae	0.000222513	0.000247119
Actinomycetaceae	8.34423e-05	0.000244842
Burkholderiaceae	0.000105356	0.000240287
Streptomycetaceae	9.48208e-05	0.000228899
Nostocaceae	0.000349362	0.000226621
Victivallaceae	0.000447133	0.000220927
Fusobacteriaceae	7.4171e-05	0.000216372
Listeriaceae	6.57425e-05	0.000181069
Micrococcaceae	0.000104514	0.000173097
Thermomonosporaceae	7.24853e-05	0.000158293
Sarcocystidae	5.4364e-05	0.000149183
Muribaculaceae	0.000187113	0.000137795
Tetrahymenidae	0.000103249	0.000133239
crAssphage_cr7_1	0.000160985	0.000132101
Plasmodiidae	7.92281e-05	0.000128684
crAssphage_cr124_1	0.000199756	0.000127546
Neisseriaceae	5.01497e-05	0.000116158
Morganellaceae	4.80426e-05	0.000103631
Nocardiaceae	4.80426e-05	0.000102492
Glomeraceae	8.42852e-05	9.67979e-05
Erwiniaceae	6.5321e-05	9.33815e-05
Flavobacteriaceae	6.36353e-05	8.99651e-05
Helicobacteraceae	9.77708e-05	8.76875e-05
Sclerotiniaceae	6.40567e-05	8.54099e-05
Paenibacillaceae	4.71997e-05	8.42711e-05
Ophiocordycipitaceae	4.71997e-05	8.19935e-05
Pectobacteriaceae	3.20284e-05	7.28831e-05
Aeromonadaceae	3.45569e-05	6.94667e-05
Saccharomycetaceae	0.000116735	6.60503e-05
Desulfotomaculaceae	7.16424e-05	6.49115e-05
Trypanosomatidae	4.2564e-05	5.80788e-05
Peptoniphilaceae	3.66641e-05	5.46624e-05
Turicibacteraceae	2.35999e-05	5.46624e-05
Porphyromonadaceae	5.98425e-05	5.35236e-05
Borreliaceae	1.93856e-05	5.35236e-05
Blastocystidae	9.18709e-05	5.23848e-05
Arcobacteraceae	5.30997e-05	5.23848e-05
Leptospiraceae	1.55928e-05	5.01072e-05
Acytosteliaceae	3.45569e-05	4.78296e-05
Dictyosteliaceae	2.8657e-05	4.78296e-05
Trichomonadidae	4.08783e-05	4.66908e-05
Phycomycetaceae	3.9614e-05	4.66908e-05
Steigviridae	2.23356e-05	4.66908e-05
Weeksellaceae	3.03427e-05	4.44132e-05
Zoogloeaceae	2.40213e-05	4.32744e-05
Salinisphaeraceae	2.06499e-05	4.32744e-05
Rhizobiaceae	3.62426e-05	4.09968e-05
Acetobacteraceae	1.64356e-05	4.09968e-05
Orbaceae	3.07641e-05	3.9858e-05
Debaryomycetaceae	2.2757e-05	3.9858e-05
Chromatiaceae	2.90784e-05	3.87192e-05
Alcaligenaceae	2.10713e-05	3.87192e-05
Oxalobacteraceae	1.09571e-05	3.87192e-05
Cavenderiaceae	2.31784e-05	3.75804e-05
Geodermatophilaceae	1.60142e-05	3.53028e-05
Legionellaceae	1.34856e-05	3.4164e-05
Thermococcaceae	1.30642e-05	3.4164e-05
Azonexaceae	2.52856e-05	3.18864e-05
Blattabacteriaceae	2.8657e-05	3.07476e-05
Prochlorococcaceae	2.78141e-05	3.07476e-05
Frankiaceae	2.10713e-06	2.96088e-05
crAssphage_cr8_1	4.17212e-05	2.73312e-05
Coxiellaceae	9.27137e-06	2.73312e-05
Eubacteriales_Family_XIII__Incertae_Sedis	4.46712e-05	2.61924e-05
Carnobacteriaceae	1.72785e-05	2.61924e-05
Hyaloscyphaceae	1.30642e-05	2.50536e-05
Melampsoraceae	1.55928e-05	2.39148e-05
Vahlkampfiidae	1.51713e-05	2.39148e-05
Sphingobacteriaceae	1.43285e-05	2.39148e-05
Eimeriidae	1.05356e-05	2.2776e-05
Thermoascaceae	1.13785e-05	1.93596e-05
Candidatus_Nanosynbacteraceae	1.17999e-05	1.82208e-05
Pseudoalteromonadaceae	2.65498e-05	1.59432e-05
Treponemataceae	0.0028185	1.36656e-05
Pelagibacteraceae	2.06499e-05	1.36656e-05
Halanaerobiaceae	1.43285e-05	1.36656e-05
Acanthamoebidae	1.85427e-05	1.25268e-05
Tenuifilaceae	1.85427e-05	1.1388e-05
Colwelliaceae	1.17999e-05	1.1388e-05
Candidatus_Borkfalkiaceae	4.63569e-05	1.02492e-05
crAssphage_cr130_1	6.27925e-05	6.83279e-06

## Sheet: Order
Order	PRE	POST
Bacteroidales	0.760849	0.661673
Eubacteriales	0.108513	0.140273
Enterobacterales	0.0449447	0.0553866
Veillonellales	0.0131565	0.0211509
Lactobacillales	0.0116402	0.0201886
Selenomonadales	0.0181449	0.0181593
Pseudonocardiales	0.00280501	0.0172779
Bifidobacteriales	0.00377556	0.0166504
Bacillales	0.00370391	0.00742383
Erysipelotrichales	0.00515657	0.00678724
Moraxellales	0.00298622	0.00580788
Brachyspirales	1.26428e-05	0.00357469
Burkholderiales	0.00262591	0.00303376
Acidaminococcales	0.000488854	0.00252586
Pseudomonadales	0.00120233	0.00239034
Campylobacterales	0.0018488	0.00206009
Pasteurellales	0.00329429	0.0020282
Coriobacteriales	0.00218214	0.00190635
Aeromonadales	0.00258461	0.00159432
Corynebacteriales	0.000474104	0.00119802
endosymbiont_of_Lamellibrachia_barhami	0.000231363	0.00114905
Hyphomicrobiales	6.02639e-05	0.00062634
Vibrionales	0.000433226	0.000622923
Desulfovibrionales	0.000463569	0.000594453
Verrucomicrobiales	0.00128661	0.000507904
Xanthomonadales	0.000213663	0.000342779
Crassvirales	0.00048759	0.000340501
Methanobacteriales	0.000500654	0.000332529
Acidithiobacillales	4.2564e-05	0.000329113
Eggerthellales	0.000220827	0.000285839
Actinomycetales	8.34423e-05	0.000244842
Streptomycetales	9.48208e-05	0.000228899
Nostocales	0.000349362	0.000226621
Victivallales	0.000447133	0.000220927
Fusobacteriales	7.4171e-05	0.000216372
Micrococcales	0.000104514	0.000173097
Eucoccidiorida	6.48996e-05	0.000171959
Hymenostomatida	0.000124742	0.00017082
Flavobacteriales	0.000122635	0.000165126
Streptosporangiales	7.24853e-05	0.000158293
Haemosporida	7.92281e-05	0.000128684
Neisseriales	5.01497e-05	0.000116158
Helotiales	7.7121e-05	0.000110464
Saccharomycetales	0.000139492	0.000105908
Glomerales	8.42852e-05	9.67979e-05
Acytosteliales	5.77354e-05	8.54099e-05
Hypocreales	4.71997e-05	8.19935e-05
Rhodocyclales	4.93068e-05	7.51607e-05
Spirochaetales	0.00283788	6.71891e-05
Legionellales	2.2757e-05	6.14952e-05
Not_Assigned	4.46712e-05	6.03564e-05
Trypanosomatida	4.2564e-05	5.80788e-05
Tissierellales	3.66641e-05	5.46624e-05
Opalinata	9.18709e-05	5.23848e-05
Leptospirales	1.55928e-05	5.01072e-05
Dictyosteliales	2.8657e-05	4.78296e-05
Trichomonadida	4.08783e-05	4.66908e-05
Mucorales	3.9614e-05	4.66908e-05
Salinisphaerales	2.06499e-05	4.32744e-05
Rhodospirillales	1.64356e-05	4.09968e-05
Orbales	3.07641e-05	3.9858e-05
Chromatiales	2.90784e-05	3.87192e-05
Geodermatophilales	1.60142e-05	3.53028e-05
Thermococcales	1.30642e-05	3.4164e-05
Synechococcales	2.78141e-05	3.07476e-05
Frankiales	2.10713e-06	2.96088e-05
Alteromonadales	3.83498e-05	2.73312e-05
Pucciniales	1.55928e-05	2.39148e-05
Sphingobacteriales	1.43285e-05	2.39148e-05
Eurotiales	1.13785e-05	1.93596e-05
Candidatus_Nanosynbacterales	1.17999e-05	1.82208e-05
Pelagibacterales	2.06499e-05	1.36656e-05
Halanaerobiales	1.43285e-05	1.36656e-05
Longamoebia	1.85427e-05	1.25268e-05
Candidatus_Borkfalkiales	4.63569e-05	1.02492e-05

## Sheet: Class
Class	PRE	POST
Bacteroidia	0.760849	0.661673
Clostridia	0.108573	0.140297
Gammaproteobacteria	0.056032	0.0695328
Negativicutes	0.0317903	0.0418361
Actinomycetia	0.00742805	0.0359963
Bacilli	0.0153441	0.0276125
Erysipelotrichia	0.00515657	0.00678724
Spirochaetia	0.00286612	0.00369199
Betaproteobacteria	0.00272536	0.00322508
Coriobacteriia	0.00240297	0.00219219
Epsilonproteobacteria	0.0018488	0.00206009
Alphaproteobacteria	9.73494e-05	0.000681002
Deltaproteobacteria	0.000463569	0.000594453
Verrucomicrobiae	0.00128661	0.000507904
Not_Assigned	0.000481268	0.000376943
Caudoviricetes	0.00048759	0.000340501
Methanobacteria	0.000500654	0.000332529
Acidithiobacillia	4.2564e-05	0.000329113
Lentisphaeria	0.000447133	0.000220927
Fusobacteriia	7.4171e-05	0.000216372
Conoidasida	6.48996e-05	0.000171959
Oligohymenophorea	0.000124742	0.00017082
Flavobacteriia	0.000122635	0.000165126
Eumycetozoa	8.63923e-05	0.000133239
Aconoidasida	7.92281e-05	0.000128684
Leotiomycetes	7.7121e-05	0.000110464
Saccharomycetes	0.000139492	0.000105908
Glomeromycetes	8.42852e-05	9.67979e-05
Sordariomycetes	4.71997e-05	8.19935e-05
Kinetoplastea	4.2564e-05	5.80788e-05
Tissierellia	3.66641e-05	5.46624e-05
Bigyra	9.18709e-05	5.23848e-05
Mucoromycetes	3.9614e-05	4.66908e-05
Thermococci	1.30642e-05	3.4164e-05
Pucciniomycetes	1.55928e-05	2.39148e-05
Sphingobacteriia	1.43285e-05	2.39148e-05
Eurotiomycetes	1.13785e-05	1.93596e-05
Candidatus_Saccharimonia	1.17999e-05	1.82208e-05

## Sheet: Phylum
Phylum	PRE	POST
Bacteroidetes	0.760986	0.661862
Firmicutes	0.160913	0.216598
Proteobacteria	0.0612096	0.0764225
Actinobacteria	0.00983103	0.0381885
Spirochaetes	0.00286612	0.00369199
Verrucomicrobia	0.00128661	0.000507904
Euryarchaeota	0.000513718	0.000366693
Uroviricota	0.00048759	0.000340501
Ascomycota	0.000275191	0.000317725
Apicomplexa	0.000144128	0.000300643
Cyanobacteria	0.000377176	0.000257369
Lentisphaerae	0.000447133	0.000220927
Fusobacteria	7.4171e-05	0.000216372
Ciliophora	0.000124742	0.00017082
Mucoromycota	0.000123899	0.000143489
Evosea	8.63923e-05	0.000133239
Euglenozoa	4.2564e-05	5.80788e-05
Not_Assigned	9.18709e-05	5.23848e-05
Parabasalia	4.08783e-05	4.66908e-05
Candidatus_Saccharibacteria	2.94998e-05	4.32744e-05
Basidiomycota	1.55928e-05	2.39148e-05
Heterolobosea	1.51713e-05	2.39148e-05
Discosea	1.85427e-05	1.25268e-05
