# Supplementary material for: Microbiota based personalized nutrition improves hyperglycaemia and hypertension parameters and reduces inflammation: a prospective, open label, controlled, randomized, comparative, proof of concept study
Source: PeerJ. 2024 Jun 26;12:e17583. doi: 10.7717/peerj.17583 (PMC11214429; doi:10.7717/peerj.17583)
Supplement: Supplemental Information 2 [file peerj-12-17583-s002.xlsx]

## Sheet: Sheet1
								Vitals comparison
Routine		Screening			Day90				BugSpeaks		Screening			Day90
	Systole	Diastole	BMI		Systole	Diastole	BMI			Systole	Diastole	BMI		Systole	Diastole	BMI				Above 130
01-001	125	87	23.9		176	98			01-004	120	82	26		128	82	26.1592			Systole		Diastole
01-002	124	80	26.1		138	80			01-006	120	80	21.5		160	88	21.5625			Pre	Post	Pre	Post
01-003	130	80	24.2		120	84			01-007	160	90	24.4		128	94	24.2701			160	128	90	94			Systole		Diastole
01-005	127	84	20.3		131	84			01-009	150	90	28.4		136	90	28.4259			150	136	90	90			Pre	Post	Pre	Post
01-008	130	80	24.9		128	92			01-012	150	95	23.4		128	86	28.8235			150	128	95	86			153.625	131.875	90	86.375
01-010	122	80	22		138	92			01-013	133	96	23.4		118	86	27.4348			133	118	96	86		SD	20.6324	8.69216	5.42481	5.39676
01-011	123	85	23.4		134	86			01-015	140	95	23.4		139	92	33.3333			140	139	95	92		pvalue	0.007109		0.0869274
01-014	120	80	23.4		132	86			01-019	120	84	23.4		138	90	24.5409			130	126	88	79
01-016	145	95	23.4		138	94			01-021	130	88	23.4		126	79	25.7812			180	134	86	84			14.3791		4.65116
01-017	126	84	23.4		143	96			01-023	122	84	23.4		120	82	22.7573			186	146	80	80
01-018	128	84	23.4		138	89			01-024	126	82	23.4		128	80	25.2976
01-020	118	85	23.4		119	89			01-025	180	86	23.4		134	84	29.6875
01-022	128	86	23.4		132	80			01-026	186	80	23.4		146	80	22.6263
01-030	120	84	23.4		128	86			01-027	128	86	23.4		129	84	26.0699
									01-029	118	88	23.4		120	82	24.6021
	87.0667		Regular		BugSpeaks
			Pre	Post	Pre	Post				22.0288
13.5681	6.60835	Systole	126	135	139	132			5.3247	10.9471
	5.58058	Diastole	84	88	87	85			4.66701
SD	Systole	Diastole			SD
	6.6	4
	13.5	5.5
	22	5.32							7.14286
	10.9	4.6			pvalue	0.243089
								5.03597
				5.03597
