# Supplementary material for: Microbiota based personalized nutrition improves hyperglycaemia and hypertension parameters and reduces inflammation: a prospective, open label, controlled, randomized, comparative, proof of concept study
Source: PeerJ. 2024 Jun 26;12:e17583. doi: 10.7717/peerj.17583 (PMC11214429; doi:10.7717/peerj.17583)
Supplement: Supplemental Information 3 [file peerj-12-17583-s003.xlsx]

## Sheet: Sheet1
Screening No	Study Arm	Subject Initials	Gender	Age	Height	Weight	BMI	Baseline HbA1c	EOS HbA1c	Mean Change	Mean % Change				Standard Deviation
01-004	Bugs Speaks Based Personalized Nutrition	U-M	Female	49	170	75	26	8.7	7.2	1.5	0.172414		Mean % reduction in HbA1c T	0.184512	0.130807
01-006	Bugs Speaks Based Personalized Nutrition	A-M	Male	45	160	55	21.5	9.8	8.1	1.7	0.173469		Mean % reduction in HbA1c R	0.103235	0.26394
01-007	Bugs Speaks Based Personalized Nutrition	R-G	Male	53	168	69	24.4	9.9	7.8	2.1	0.212121		P Value	0.157481
01-009	Bugs Speaks Based Personalized Nutrition	A-A	Female	48	180	92	28.4	7.2	6.5	0.7	0.0972222
01-012	Bugs Speaks Based Personalized Nutrition	H-P-S	Male	53	170	70	24.2	7.8	7.4	0.4	0.0512821
01-013	Bugs Speaks Based Personalized Nutrition	L-B-M	Male	50	162	70	26.7	7	5.5	1.5	0.214286		Comments
01-015	Bugs Speaks Based Personalized Nutrition	M-G	Male	62	180	108	33.3	7	6.7	0.3	0.0428571		Change highlighted data in source
01-019	Bugs Speaks Based Personalized Nutrition	N-P-M	Male	55	174	74	24.4	7.9	6.3	1.6	0.202532		Values are significant based on standard deviation, however large scale studies are needed to show statistically significant improvement
01-021	Bugs Speaks Based Personalized Nutrition	R-M	Female	65	160	69	27	7	6.9	0.1	0.0142857
01-023	Bugs Speaks Based Personalized Nutrition	R-S	Male	64	174	68	22.5	10	5.1	4.9	0.49
01-024	Bugs Speaks Based Personalized Nutrition	M-S	Female	46	168	71	25.2	8.4	5.7	2.7	0.321429
01-025	Bugs Speaks Based Personalized Nutrition	U-D	Male	53	160	80	31.3	9	5.5	3.5	0.388889
01-026	Bugs Speaks Based Personalized Nutrition	R-T	Male	57	165	60	22	9.5	7.3	2.2	0.231579
01-027	Bugs Speaks Based Personalized Nutrition	V-T	Male	59	178	82	25.9	7.4	7	0.4	0.0540541
01-029	Bugs Speaks Based Personalized Nutrition	R-P	Male	61	170	70	24.2	7.9	7.1	0.8	0.101266
01-001	Routine Nutrition	K-S	Female	60	165	65	23.9	7.5	12.3	-4.8	-0.64
01-002	Routine Nutrition	D-M	Male	65	175	80	26.1	7.1	5.6	1.5	0.211268
01-003	Routine Nutrition	S-S	Male	49	160	62	24.2	7.4	7.2	0.2	0.027027
01-005	Routine Nutrition	U-M	Female	42	160	52	20.3	7.8	8.2	-0.4	-0.0512821
01-008	Routine Nutrition	S-P	Male	46	170	72	24.9	7.6	6.1	1.5	0.197368
01-010	Routine Nutrition	G-S	Female	51	165	60	22	8	5.8	2.2	0.275
01-011	Routine Nutrition	S-G	Female	50	160	60	23.4	8.9	7.6	1.3	0.146067
01-014	Routine Nutrition	N-T	Female	62	175	60	19.6	9.8	5.1	4.7	0.479592
01-016	Routine Nutrition	D-M	Male	55	166	72	26.1	7.9	7.4	0.5	0.0632911
01-017	Routine Nutrition	R-P	Female	65	158	60	24	8.4	4.9	3.5	0.416667
01-018	Routine Nutrition	K-R	Male	64	176	65	21	7	6.5	0.5	0.0714286
01-020	Routine Nutrition	A-M	Female	54	159	70	27.7	9.8	9.2	0.6	0.0612245
01-022	Routine Nutrition	B-R	Male	46	178	70	22.1	9.5	10.7	-1.2	-0.126316
01-030	Routine Nutrition	S-K	Male	45	172	68	23	8.6	5.9	2.7	0.313953

## Sheet: Sheet3
BugSpeaks Nutrition			Regular Nutrition					Bugspeaks			Regular
Pre	Post		Pre	Post				mean HbA1c			mean HbA1c
8.7	7.2		7.5	12.3				Pre	post		Pre	post
9.8	8.1		7.1	5.6			HbA1c	8.3	6.67333		8.23571	7.32143
9.9	7.8		7.4	7.2			SD	1.11676	0.894001		0.957245	2.16375
7.2	6.5		7.8	8.2			Ttest	0.000309398			0.154313
7.8	7.4		7.6	6.1
7	5.5		8	5.8				BugSpeaks	Regular
7	6.7		8.9	7.6			%drop	19.5984	11.1015
7.9	6.3		9.8	5.1
7	6.9		7.9	7.4
10	5.1		8.4	4.9
8.4	5.7		7	6.5
9	5.5		9.8	9.2
9.5	7.3		9.5	10.7
7.4	7		8.6	5.9
7.9	7.1

## Sheet: Sheet2
		01-004	8.7	7.2
		01-006	9.8	8.1
		01-007	9.9	7.8
		01-009	7.2	6.5
		01-012	7.8	7.4
		01-013	7	5.5
		01-015	7	6.7
		01-019	7.9	6.3
		01-021	7	6.9
		01-023	10	5.1
		01-024	8.4	5.7
		01-025	9	5.5
		01-026	9.5	7.3
		01-027	7.4	7
		01-029	7.9	7.1
		01-001	7.5	12.3
		01-002	7.1	5.6
		01-003	7.4	7.2
		01-005	7.8	8.2
		01-008	7.6	6.1
		01-010	8	5.8
		01-011	8.9	7.6
		01-014	9.8	5.1
		01-016	7.9	7.4
		01-017	8.4	4.9
		01-018	7	6.5
		01-020	9.8	9.2
		01-022	9.5	10.7
		01-030	8.6	5.9
