# Supplementary material for: Microbiota based personalized nutrition improves hyperglycaemia and hypertension parameters and reduces inflammation: a prospective, open label, controlled, randomized, comparative, proof of concept study
Source: PeerJ. 2024 Jun 26;12:e17583. doi: 10.7717/peerj.17583 (PMC11214429; doi:10.7717/peerj.17583)
Supplement: Supplemental Information 4 [file peerj-12-17583-s004.xlsx]

## Sheet: Sheet1
Screening No	Study Arm	Subject Initials	Gender	Age	Height	Weight	BMI	Baseline CRP	EOS CRP	Mean Change	Mean % Change				Standard Deviation
01-004	Bugs Speaks Based Personalized Nutrition	U-M	Female	49	170	75	26	4.7	0.3	4.4	0.93617		Mean % reduction in CRP T	-1.45306	3.99723
01-006	Bugs Speaks Based Personalized Nutrition	A-M	Male	45	160	55	21.5	2	0.2	1.8	0.9		Mean % reduction in CRP R	-0.715236	1.65827
01-007	Bugs Speaks Based Personalized Nutrition	R-G	Male	53	168	69	24.4	4.2	3.6	0.6	0.142857		P Value	0.270689
01-009	Bugs Speaks Based Personalized Nutrition	A-A	Female	48	180	92	28.4	4.5	13.2	-8.7	-1.93333
01-012	Bugs Speaks Based Personalized Nutrition	H-P-S	Male	53	170	70	24.2	0.1	0.3	-0.2	-2
01-013	Bugs Speaks Based Personalized Nutrition	L-B-M	Male	50	162	70	26.7	4.3	0.2	4.1	0.953488		Comments
01-015	Bugs Speaks Based Personalized Nutrition	M-G	Male	62	180	108	33.3	3	0.9	2.1	0.7		Change highlighted data in source
01-019	Bugs Speaks Based Personalized Nutrition	N-P-M	Male	55	174	74	24.4	0.2	1.8	-1.6	-8		Values are significant based on standard deviation, however large scale studies are needed to show statistically significant improvement
01-021	Bugs Speaks Based Personalized Nutrition	R-M	Female	65	160	69	27	11.8	5.2	6.6	0.559322
01-023	Bugs Speaks Based Personalized Nutrition	R-S	Male	64	174	68	22.5	22.1	19.3	2.8	0.126697
01-024	Bugs Speaks Based Personalized Nutrition	M-S	Female	46	168	71	25.2	10	10.7	-0.7	-0.07
01-025	Bugs Speaks Based Personalized Nutrition	U-D	Male	53	160	80	31.3	0.9	0.7	0.2	0.222222
01-026	Bugs Speaks Based Personalized Nutrition	R-T	Male	57	165	60	22	0.2	0.2	0	0
01-027	Bugs Speaks Based Personalized Nutrition	V-T	Male	59	178	82	25.9	0.2	3	-2.8	-14
01-029	Bugs Speaks Based Personalized Nutrition	R-P	Male	61	170	70	24.2	0.3	0.4	-0.1	-0.333333
01-001	Routine Nutrition	K-S	Female	60	165	65	23.9	3	1.1	1.9	0.633333
01-002	Routine Nutrition	D-M	Male	65	175	80	26.1	6	4.3	1.7	0.283333
01-003	Routine Nutrition	S-S	Male	49	160	62	24.2	0.5	0.7	-0.2	-0.4
01-005	Routine Nutrition	U-M	Female	42	160	52	20.3	6.5	4	2.5	0.384615
01-008	Routine Nutrition	S-P	Male	46	170	72	24.9	4.7	4.3	0.4	0.0851064
01-010	Routine Nutrition	G-S	Female	51	165	60	22	2.2	9.2	-7	-3.18182
01-011	Routine Nutrition	S-G	Female	50	160	60	23.4	0.7	2.2	-1.5	-2.14286
01-014	Routine Nutrition	N-T	Female	62	175	60	19.6	0.1	0.4	-0.3	-3
01-016	Routine Nutrition	D-M	Male	55	166	72	26.1	1.7	0.2	1.5	0.882353
01-017	Routine Nutrition	R-P	Female	65	158	60	24	7.8	1	6.8	0.871795
01-018	Routine Nutrition	K-R	Male	64	176	65	21	11.2	6.3	4.9	0.4375
01-020	Routine Nutrition	A-M	Female	54	159	70	27.7	0.2	1	-0.8	-4
01-022	Routine Nutrition	B-R	Male	46	178	70	22.1	1.2	3.2	-2	-1.66667
01-030	Routine Nutrition	S-K	Male	45	172	68	23	0.5	0.1	0.4	0.8

## Sheet: Sheet2
		01-004	4.7	0.3
		01-006	2	0.2
		01-007	4.2	3.6													Maximun CRP(Baseline)=23
		01-009	4.5	13.2
		01-012	0.1	0.3													Maximun CRP(EOS)=14
		01-013	4.3	0.2
		01-015	3	0.9
		01-019	0.2	1.8
		01-021	11.8	5.2
		01-023	22.1	19.3
		01-024	10	10.7
		01-025	0.9	0.7
		01-026	0.2	0.2
		01-027	0.2	3
		01-029	0.3	0.4
		01-001	3	1.1
		01-002	6	4.3
		01-003	0.5	0.7
		01-005	6.5	4
		01-008	4.7	4.3
		01-010	2.2	9.2
		01-011	0.7	2.2
		01-014	0.1	0.4
		01-016	1.7	0.2
		01-017	7.8	1
		01-018	11.2	6.3
		01-020	0.2	1
		01-022	1.2	3.2
		01-030	0.5	0.1

## Sheet: Sheet3
BugSpeaks			Routine
Baseline	EOS		Baseline	EOS			BugSpeaks				Routine
0.1	0.3		0.1	0.4			Pre	Post			Pre	Post
0.2	1.8		0.2	1			4.56667	4			3.30714	2.71429
0.2	0.2		0.5	0.7		SD	6.01981	5.82617			3.42737	2.67693
0.2	3		0.5	0.1		Ttest	0.547471				0.505895
0.3	0.4		0.7	2.2
0.9	0.7		1.2	3.2
2	0.2		1.7	0.2			% drop										% drop
3	0.9		2.2	9.2			BugSpeaks	Regular									BugSpeaks	Regular
4.2	3.6		3	1.1			12.4088	17.9266									19.5195	27.0531
4.3	0.2		4.7	4.3
4.5	13.2		6	4.3
4.7	0.3		6.5	4
10	10.7		7.8	1		BugSpeaks				Routine					BugSpeaks				Routine
11.8	5.2		11.2	6.3		Pre	Post			Baseline	EOS				Pre	Post			Pre	Post
22.1	19.3					2	0.2			2.2	9.2				7.4	5.95556			5.91429	4.31429
						3	0.9			3	1.1			SD	6.38631	6.91902			3.04435	2.8644
						4.2	3.6			4.7	4.3			ttest	0.350737				0.369442
						4.3	0.2			6	4.3
						4.5	13.2			6.5	4
						4.7	0.3			7.8	1
						10	10.7			11.2	6.3
						11.8	5.2
						22.1	19.3
																% decrease
																Pre	Post
																100	80.5
